# Supplementary material for: Worldwide antibiotic resistance dynamics: how different is it from one drug-bug pair to another?
Source: bioRxiv or medRxiv preprint supplement (doi:10.1101/2022.02.09.22270726), 2023-04-05
Supplement: Supplementary file [file media-1.pdf]

## Appendix

### **Worldwide antibiotic resistance dynamics: how different is it from one drug-bug pair to another?**

*Eve Rahbe<sup>1,2</sup>, Laurence Watier<sup>1,2</sup>, Didier Guillemot<sup>1,2</sup>, Philippe Glaser<sup>3\*</sup> and Lulla Opatowski<sup>1,2\*</sup>*

- 1. Institut Pasteur, Epidemiology and Modelling of Antimicrobials Evasion (EMEA) research unit, Paris, France*
- 2. Université Paris-Saclay, UVSQ, Inserm, CESP, Anti-infective evasion and pharmacoepidemiology research team, Montigny-Le-Bretonneux, France*
- 3. Institut Pasteur, Ecology and Evolution of Antibiotic Resistance research unit, Paris, France*

*\* Contributed equally*

## Table of contents:

|                                                                                                                                                                                                                                                                                                                                     |    |
|-------------------------------------------------------------------------------------------------------------------------------------------------------------------------------------------------------------------------------------------------------------------------------------------------------------------------------------|----|
| Supplementary methods.....                                                                                                                                                                                                                                                                                                          | 2  |
| Supplementary Figure S1. Countries included in the analysis (C=51 over 2006-2019).<br>.....                                                                                                                                                                                                                                         | 3  |
| Supplementary Figure S2. Number of isolates tested per drug-bug pair in the ATLAS<br>database, by regions of the world (2006-2019).....                                                                                                                                                                                             | 4  |
| Supplementary Figure S3. Distribution of MIC values for 3 years (2006, 2012 and<br>2019), for all drug-bug pairs. ....                                                                                                                                                                                                              | 6  |
| Supplementary Table S1. Antibiotic molecules tested to determine antibiotic<br>resistance susceptibility for isolates in the ATLAS database.....                                                                                                                                                                                    | 7  |
| Supplementary Table S2. Co-variables data summary used in the statistical analysis.<br>.....                                                                                                                                                                                                                                        | 9  |
| Supplementary Table S3. DDD to gram conversion coefficients A by antibiotic class.<br>.....                                                                                                                                                                                                                                         | 10 |
| Supplementary Table S4. Molecules included in each class for antibiotic sales<br>categories.....                                                                                                                                                                                                                                    | 11 |
| Supplementary Figure S4. Correlogram for covariables data used in the mixed-effect<br>negative binomial model (for all 51 countries and 14 years). ....                                                                                                                                                                             | 12 |
| Supplementary results .....                                                                                                                                                                                                                                                                                                         | 13 |
| Supplementary Figure S5. Temporal trends (2006-2019) per country, for all drug-bug<br>pairs.....                                                                                                                                                                                                                                    | 18 |
| Supplementary Figure S6. Observed vs fitted values by final multivariable models<br>(M_multi), for all drug-bug pairs.....                                                                                                                                                                                                          | 23 |
| Supplementary Table S5. Univariate results for the main analysis and sensitivity<br>analyses 1 (analysis with a 20 isolates threshold for country-year observations), 2<br>(analysis without countries where IQVIA data is not available) and 3 (analysis with<br>isolates from blood source only), for all drug-bug pairs. ....    | 28 |
| Supplementary Table S6. Multivariable results for the main analysis and sensitivity<br>analyses 1 (analysis with a 20 isolates threshold for country-year observations), 2<br>(analysis without countries where IQVIA data is not available) and 3 (analysis with<br>isolates from blood source only), for all drug-bug pairs. .... | 33 |
| Supplementary Result 1. Sensitivity analyses description.....                                                                                                                                                                                                                                                                       | 34 |
| Supplementary Figure S7. Spatial Random Effects distribution, for all drug-bug pairs.<br>.....                                                                                                                                                                                                                                      | 39 |

## Supplementary methods

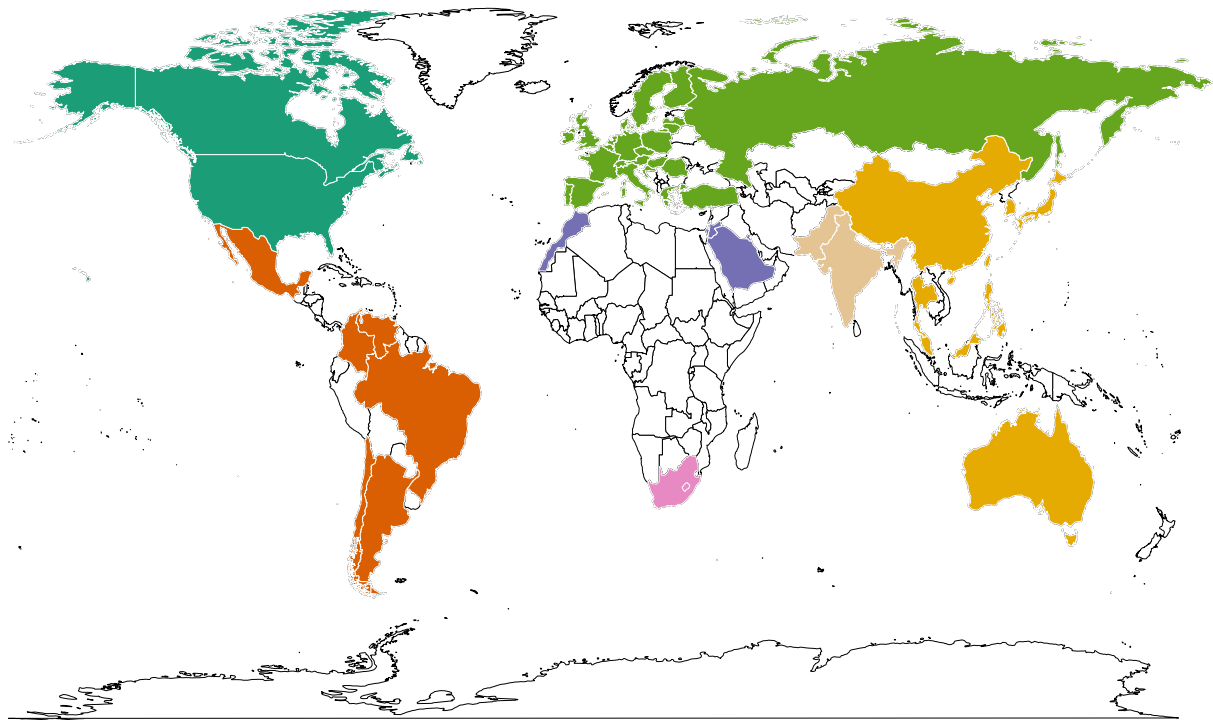

World's Regions (from World Bank Indicators)

|                                                                 |                                                                  |                                                    |                                                        |
|-----------------------------------------------------------------|------------------------------------------------------------------|----------------------------------------------------|--------------------------------------------------------|
| <span style="color: yellow;">■</span> East Asia & Pacific       | <span style="color: orange;">■</span> Latin America & Caribbean  | <span style="color: green;">■</span> North America | <span style="color: pink;">■</span> Sub-Saharan Africa |
| <span style="color: lightgreen;">■</span> Europe & Central Asia | <span style="color: purple;">■</span> Middle East & North Africa | <span style="color: tan;">■</span> South Asia      |                                                        |

**Supplementary Figure S1. Countries included in the analysis (C=51 over 2006-2019).**

The following countries, by world's regions (from the World's Bank indicators), were included in the analysis:

- North America: United States, Canada.
- Latin America & Caribbean: Argentina, Brazil, Chile, Colombia, México, Venezuela and Central America (grouping Panamá, Guatemala, Honduras, Nicaragua, Costa Rica, El Salvador);
- Europe & Central Asia: Austria, Belgium, Croatia, Czech Republic, Denmark, Finland, France, Germany, Greece, Hungary, Ireland, Italy, Latvia, Lithuania, Netherlands, Poland, Portugal, Romania, Russia, Spain, Sweden, Switzerland, Turkey, United Kingdom.
- East Asia & Pacific: Australia, China, Hong Kong, Japan, South Korea, Malaysia, Philippines, Singapore, Taiwan, Thailand.
- South Asia: India, Pakistan.
- Sub-Saharan Africa: South Africa.
- Middle East & North Africa: Israel, Jordan, Kuwait, Morocco, Saudi Arabia.

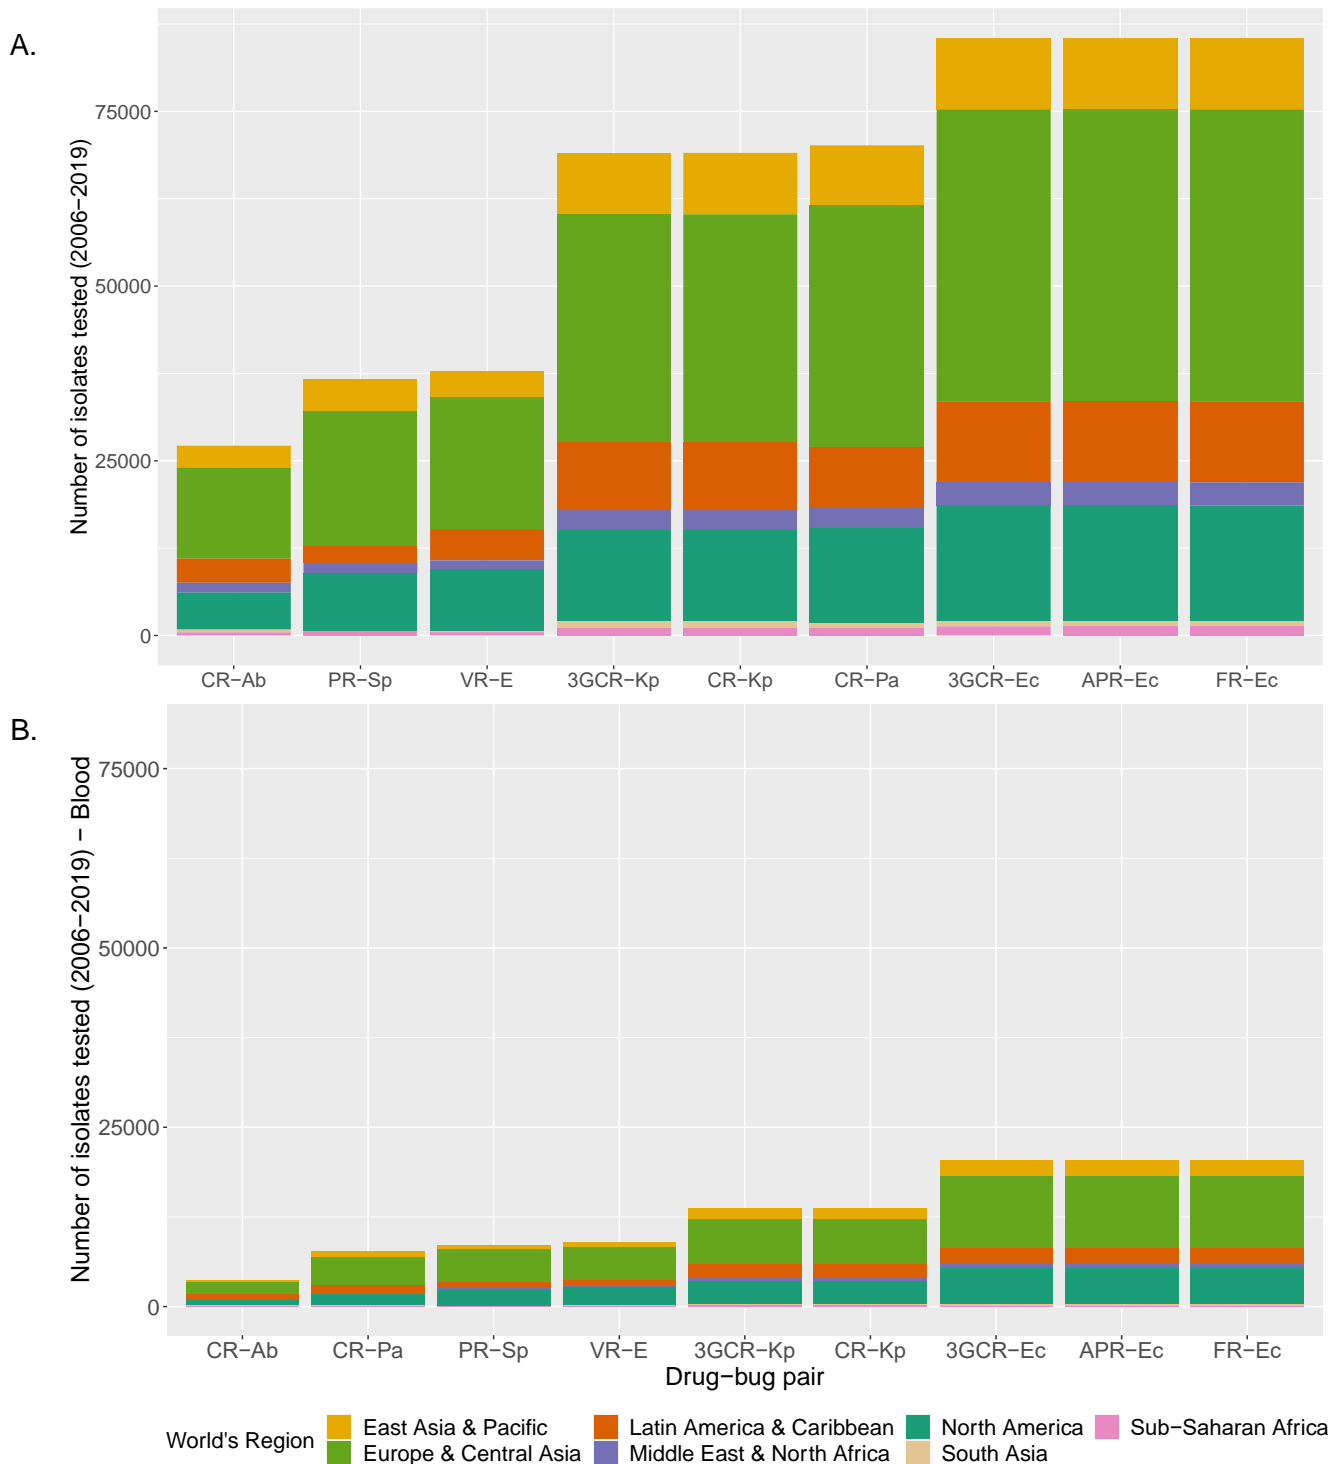

**Supplementary Figure S2. Number of isolates tested per drug-bug pair in the ATLAS database, by regions of the world (2006-2019).**

(A) ATLAS data represented a total number of tested isolates from all infection sources per drug-bug pair (main analysis) as follow:  $n = 85485$  each for FR-*Ec*, APR-*Ec* and 3GCR-*Ec*;  $n = 70151$  for CR-*Pa*;  $n = 69064$  each for 3GCR-*Kp* and CR-*Kp*;  $n = 37739$  for VR-*E*;  $n = 36685$  for PR-*Sp*;  $n = 27153$  for CR-*Ab*. (B) ATLAS data represented a total number of tested isolates from blood source only per drug-bug pair (sensitivity analysis 3) as follow:  $n = 20401$  each for FR-*Ec*, APR-*Ec* and 3GCR-*Ec*;  $n = 13699$  each for 3GCR-*Kp* and CR-*Kp*;  $n = 9017$  for VR-*E*;  $n = 8560$  for PR-*Sp*;  $n = 7752$  for CR-*Pa*;  $n = 3736$  for CR-*Ab*.

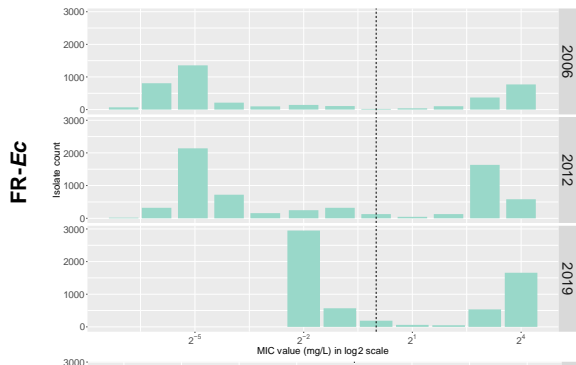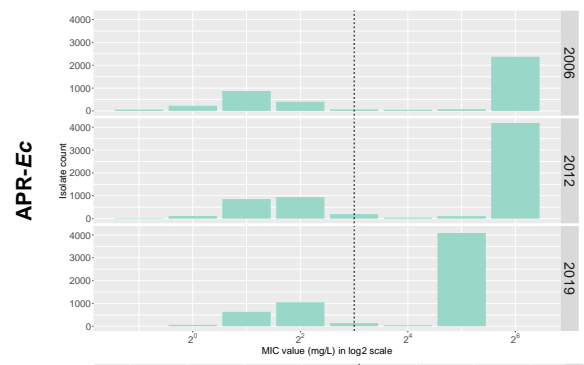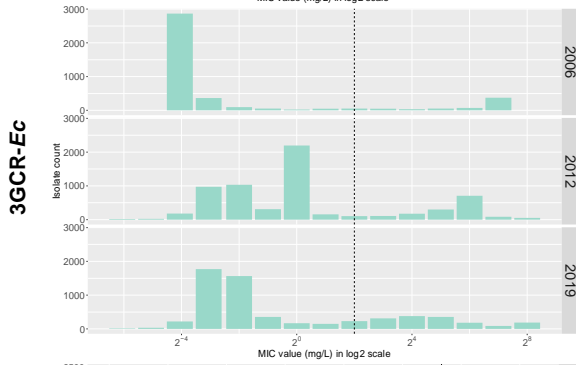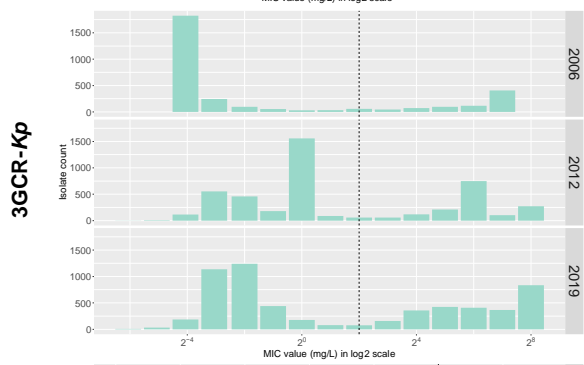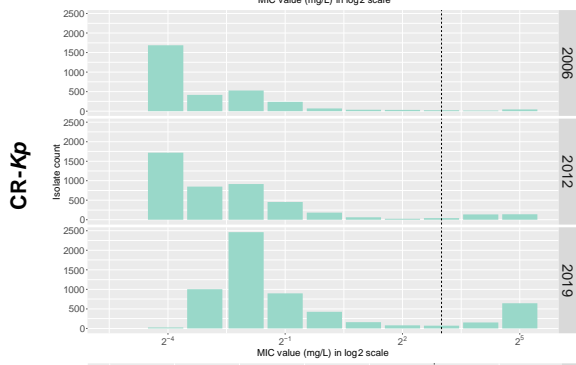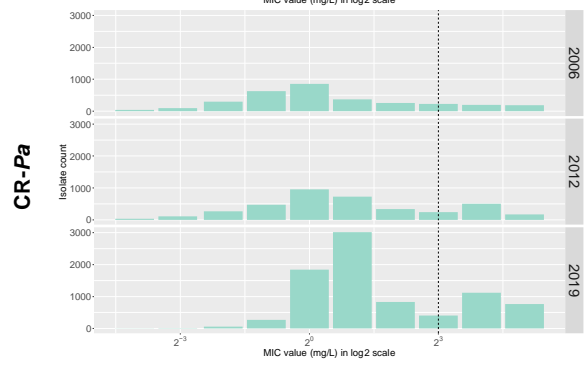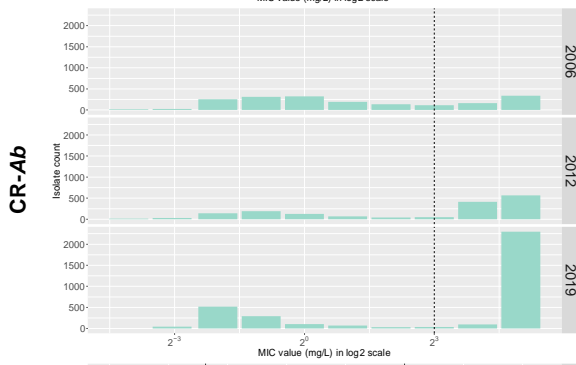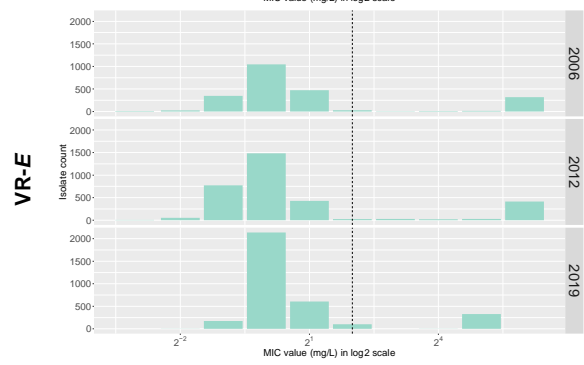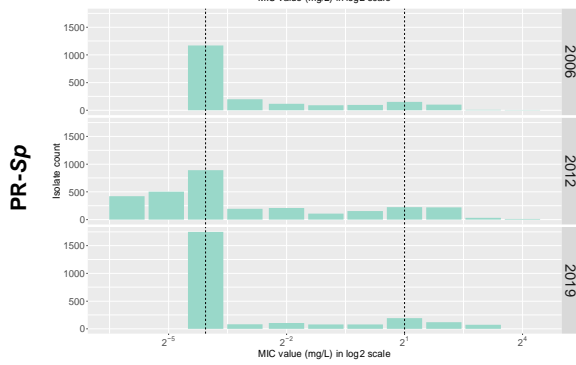

**Supplementary Figure S3. Distribution of MIC values for 3 years (2006, 2012 and 2019), for all drug-bug pairs.**

Represented here are the raw data for all bacterial isolates tested against a specific class of antibiotics in ATLAS. If two molecules are considered in a class, highest MIC value between the 2 molecules is considered. MIC values are shown in log scale base 2. The MIC breakpoints from the 2019 *European Committee on Antimicrobial Susceptibility Testing* (EUCAST) standards are depicted with the dashed lines.

| <b>Resistance</b>               | <b>Molecules tested</b>        |
|---------------------------------|--------------------------------|
| Fluoroquinolones                | Ciprofloxacin and levofloxacin |
| Aminopenicillins                | Ampicillin                     |
| Third generation cephalosporins | Ceftriaxone and ceftazidime    |
| Carbapenems                     | Imipenem and meropenem         |
| Penicillin                      | Penicillin G                   |
| Vancomycin                      | Vancomycin                     |

***Supplementary Table S1. Antibiotic molecules tested to determine antibiotic resistance susceptibility for isolates in the ATLAS database.***



| Co-variables                              | Unit                                                                                | Source                                                                                          | Available countries (C=51)                                                           | Available years | Average (SD)           | Minimum         | Maximum |       |
|-------------------------------------------|-------------------------------------------------------------------------------------|-------------------------------------------------------------------------------------------------|--------------------------------------------------------------------------------------|-----------------|------------------------|-----------------|---------|-------|
| Country-year observations                 | Population density                                                                  | World Bank Data                                                                                 | 50<br>(Taiwan not available)                                                         | 2006-2019       | 417.6<br>(1 380.3)     | 2.7             | 7 990.3 |       |
|                                           | GDP per capita, PPP                                                                 | World Bank Data                                                                                 | 50<br>(Taiwan not available)                                                         | 2006-2019       | 31 530.7<br>(18 506.8) | 3237            | 101 376 |       |
|                                           | Tourism Arrivals                                                                    | World Bank Data                                                                                 | 50<br>(Taiwan not available)                                                         | 2006-2019       | 141.5<br>(215.3)       | 0.38            | 1475.6  |       |
|                                           | Tourism Departures                                                                  | World Bank Data                                                                                 | 48<br>(Pakistan, South Africa, Malaysia and Taiwan not available)                    | 2006-2019       | 99.5<br>(180.6)        | 0.71            | 1261.6  |       |
|                                           | Broad spectrum penicillins sales                                                    | IQVIA MIDAS Data or ESAC-Net Data                                                               | 47<br>43 via IQVIA MIDAS and 4 via ESAC-Net (Denmark, Netherland, Latvia, Lithuania) | 2006-2019       | 11.3<br>(6.8)          | 0.6             | 33.3    |       |
|                                           | Cephalosporins sales                                                                |                                                                                                 |                                                                                      |                 |                        |                 |         |       |
|                                           | Carbapenems sales                                                                   |                                                                                                 |                                                                                      |                 |                        |                 |         |       |
|                                           | Quinolones sales                                                                    |                                                                                                 |                                                                                      |                 |                        |                 |         |       |
|                                           | Macrolides sales                                                                    | Grams/1000 inhabitants/day                                                                      | MERRA-2 Data                                                                         | 51              | 2006-2019              | 288.38<br>(6.9) | 276.6   | 301.9 |
|                                           | Trimethoprim and combinations sales                                                 |                                                                                                 |                                                                                      |                 |                        |                 |         |       |
|                                           | Glycopeptides sales                                                                 |                                                                                                 |                                                                                      |                 |                        |                 |         |       |
|                                           | Average annual Temperature                                                          | Kelvin                                                                                          | MERRA-2 Data                                                                         | 51              | 2006-2019              | 96.5<br>(95.5)  | 3       | 512.4 |
|                                           | Average annual Rainfall                                                             | Rain depth in millimeters                                                                       | MERRA-2 Data                                                                         | 51              | 2006-2019              | 70.7<br>(15.2)  | 19.6    | 90    |
|                                           | Average annual Relative Humidity                                                    | Normalized pseudorelative humidity (water vapor mixing ratio scaled by its saturation value, %) | MERRA-2 Data                                                                         | 51              | 2006-2019              | 57.5<br>(12)    | 23      | 83.5  |
| GHS index                                 | Global Health Security index Data                                                   | 49<br>(Hong Kong and Taiwan not available)                                                      | 2019                                                                                 | 2019            | 0.6<br>(1.4)           | 0               | 7.9     |       |
| Population facing extreme climatic events | Annual number of people facing extreme climatic events over national population (%) | World Bank Data                                                                                 | 49<br>(Singapore and Taiwan not available)                                           | 2019            |                        |                 |         |       |

***Supplementary Table S2. Co-variables data summary used in the statistical analysis.***

Average (and standard deviation SD), minimum and maximum values are calculated over all countries and years available.

| Antibiotic class              | A<br>(DDD to gram conversion) |
|-------------------------------|-------------------------------|
| Broad spectrum Penicillin     | 2                             |
| Carbapenem                    | 3.5                           |
| Cephalosporin                 | 1.4                           |
| Quinolone                     | 0.95                          |
| Macrolide                     | 0.6                           |
| Trimethoprim and combinations | 1.8                           |
| Glycopeptide                  | 1.45                          |

**Supplementary Table S3. DDD to gram conversion coefficients A by antibiotic class.**

Coefficients are calculated based on consumption data in the community and hospitals from available countries in both ESAC-Net and IQVIA MIDAS. It is constructed as follow:

*Antibiotic consumption in grams/1000inh/day*  $_{IQVIA} = A * \text{antibiotic consumption in DDD/1000inh/day}$   $_{ECDC}$

| <b>Class</b>                                | <b>Molecules</b>                                                                                                                                                                                                                                                                                         | <b>Corresponding group in WHO/ATC indexing system</b> |
|---------------------------------------------|----------------------------------------------------------------------------------------------------------------------------------------------------------------------------------------------------------------------------------------------------------------------------------------------------------|-------------------------------------------------------|
| Broad spectrum Penicillins and combinations | Amoxicillin, Ampicillin, Amoxicillin-clavulanate, Ampicillin-sulbactam, Carbenicillin, Carfecillin, Carindacillin, Piperacillin-tazobactam, Ticarcillin, Sultamicillin, Piperacillin, Temocillin                                                                                                         | J01CA<br>J01CR                                        |
| Cephalosporins                              | Cefazolin, Cefaclor, Ceftibuten, Cefadroxil, Cefdinir, Cefditoren pivoxil, Cefepime, Ceftizoxime, Cefotetan, Cefotaxime, Cefoxitin, Cefpodoxime proxetil, Cefprozil, Ceftazidime, Cefuroxime axetil, Ceftriaxone, Cefuroxime, Cefalexin, Cefradine, Loracarbef, Cefixime, Ceftaroline fosamil, Faropenem | J01DB<br>J01DC<br>J01DD<br>J01DE                      |
| Carbapenems                                 | Doripenem, Imipenem-cilastatin, Ertapenem, Meropenem                                                                                                                                                                                                                                                     | J01DH                                                 |
| Quinolones                                  | Moxifloxacin, Ciprofloxacin, Gemifloxacin, Ofloxacin, Levofloxacin, Lomefloxacin, Norfloxacin, Enoxacin, Gatifloxacin, Trovafloxacin, Sparfloxacin                                                                                                                                                       | J01M                                                  |
| Macrolides                                  | Erythromycin, Azithromycin, Clarithromycin, Dirithromycin, Telithromycin, Clindamycin, Fidaxomicin, Lincomycin, Troleandomycin, Dalfopristin-quinupristin                                                                                                                                                | J01F                                                  |
| Trimethoprim and combinations               | Sulfamethoxazole-trimethoprim, Sulfamethoxazole, Sulfisoxazole, Sulfadiazine, Trimethoprim                                                                                                                                                                                                               | J01EA<br>J01EC<br>J01EE                               |
| Glycopeptides                               | Vancomycin, Telavancin                                                                                                                                                                                                                                                                                   | J01XA                                                 |

**Supplementary Table S4. Molecules included in each class for antibiotic sales categories.**

Methodology is from *ResistanceMap*, available at:

<https://resistancemap.cddep.org/MethodologyAU.php>

WHO/ATC indexing system for antimicrobials, available at:

[https://www.whocc.no/atc\\_ddd\\_index/](https://www.whocc.no/atc_ddd_index/)

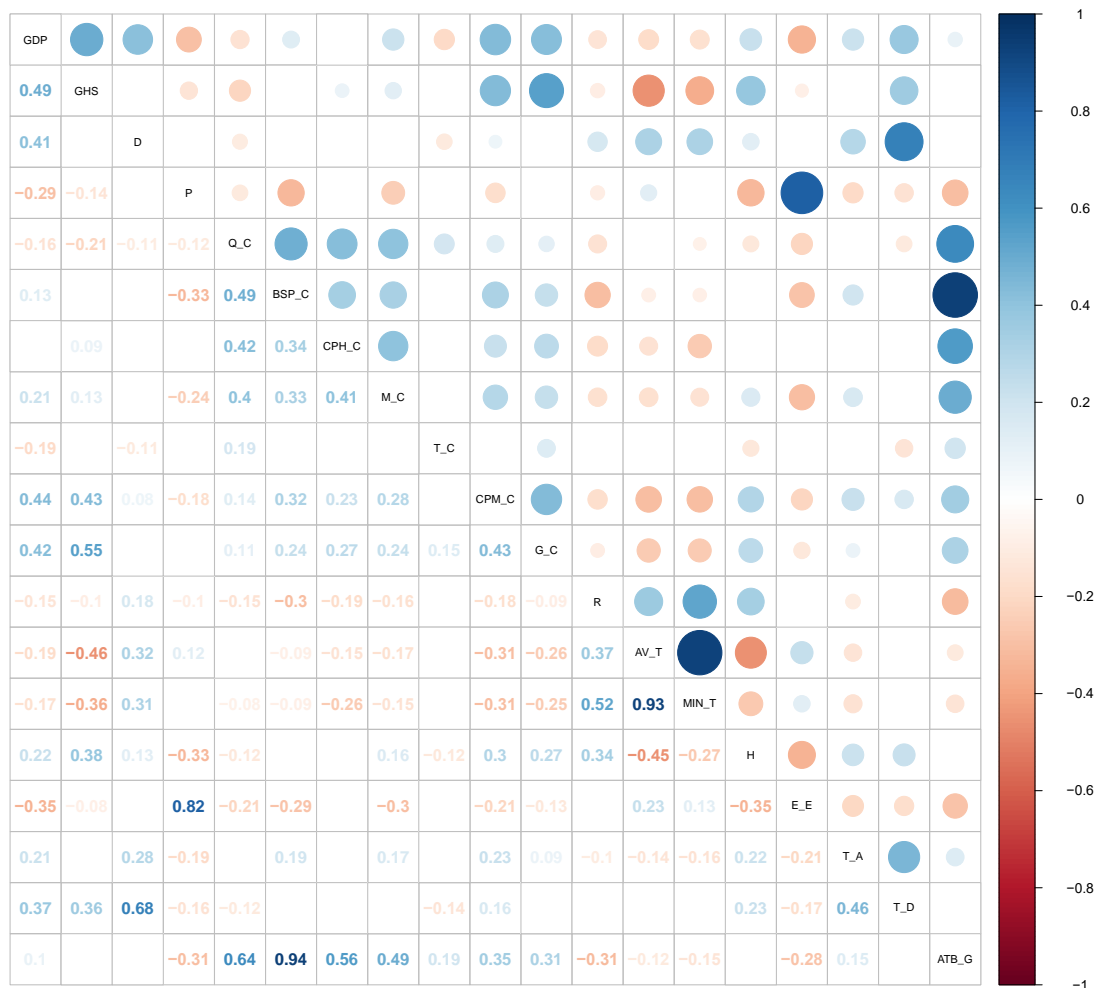

**Supplementary Figure S4. Correlogram for covariables data used in the mixed-effect negative binomial model (for all 51 countries and 14 years).**

GDP: Gross Domestic product; GHS: Global Health Security Index; D: population density; P: population number; Q\_C: quinolone consumption; BSP\_C: broad spectrum penicillin consumption; CPH\_C: cephalosporin consumption; M\_C: macrolide consumption; T\_C: trimethoprim consumption; CPM\_C: carbapenem consumption; G\_C: glycopeptide consumption; R: average rainfall; AV\_T: average temperature; MIN\_T: minimum temperature; H: average relative humidity; E\_E: extreme climatic events, T\_A: tourism arrivals; T\_D: tourism departures; ATB\_G: global consumption.

Shown here are the Pearson correlation coefficient for each pair of variables ( $r$ ). Blue colors represent positive correlation between variables. Red colors represent high negative correlation. Only significant correlation coefficients ( $p$ -value < 5%) are shown in the correlogram. Co-variables associated with  $r > |0.7|$  were excluded from the model. Population number and Minimum Temperature were excluded (because considered less biologically relevant or less correlated to ABR rates). Global antibiotic consumption was not included at the same time as broad-spectrum penicillin consumption in any model.

## Supplementary results

### A. FR-Ec

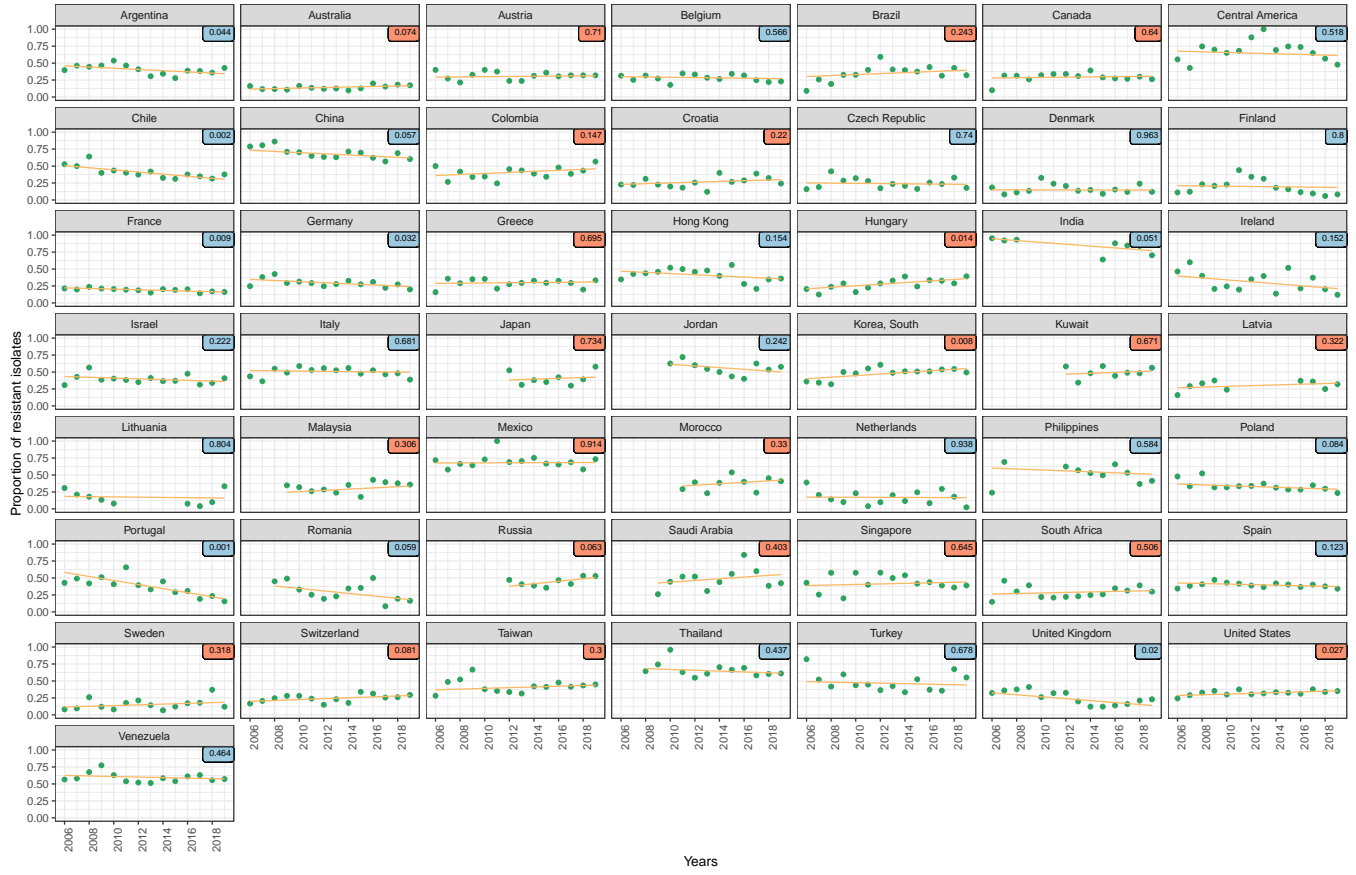

### B. APR-Ec

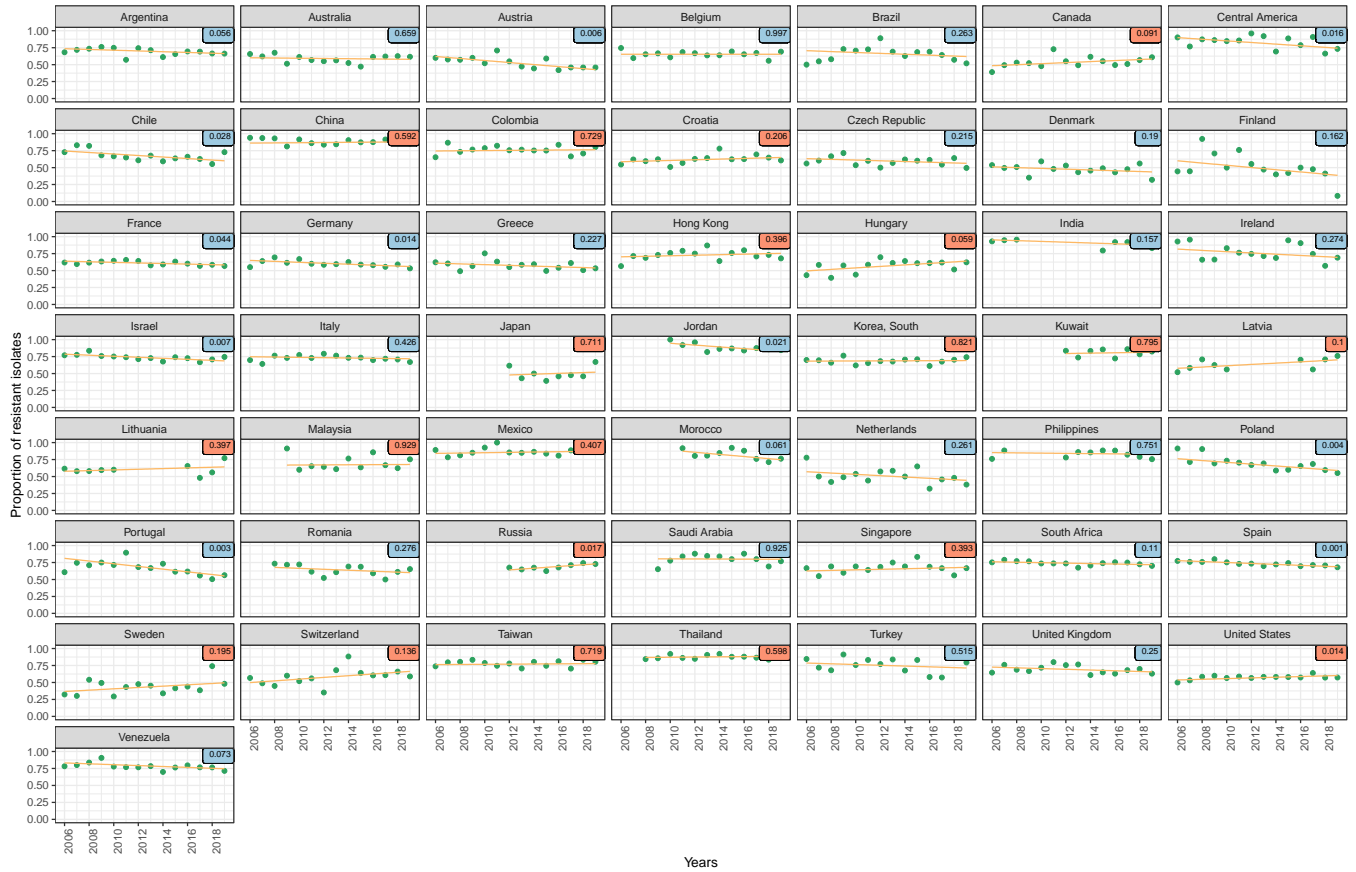

### C. 3GCR-Ec

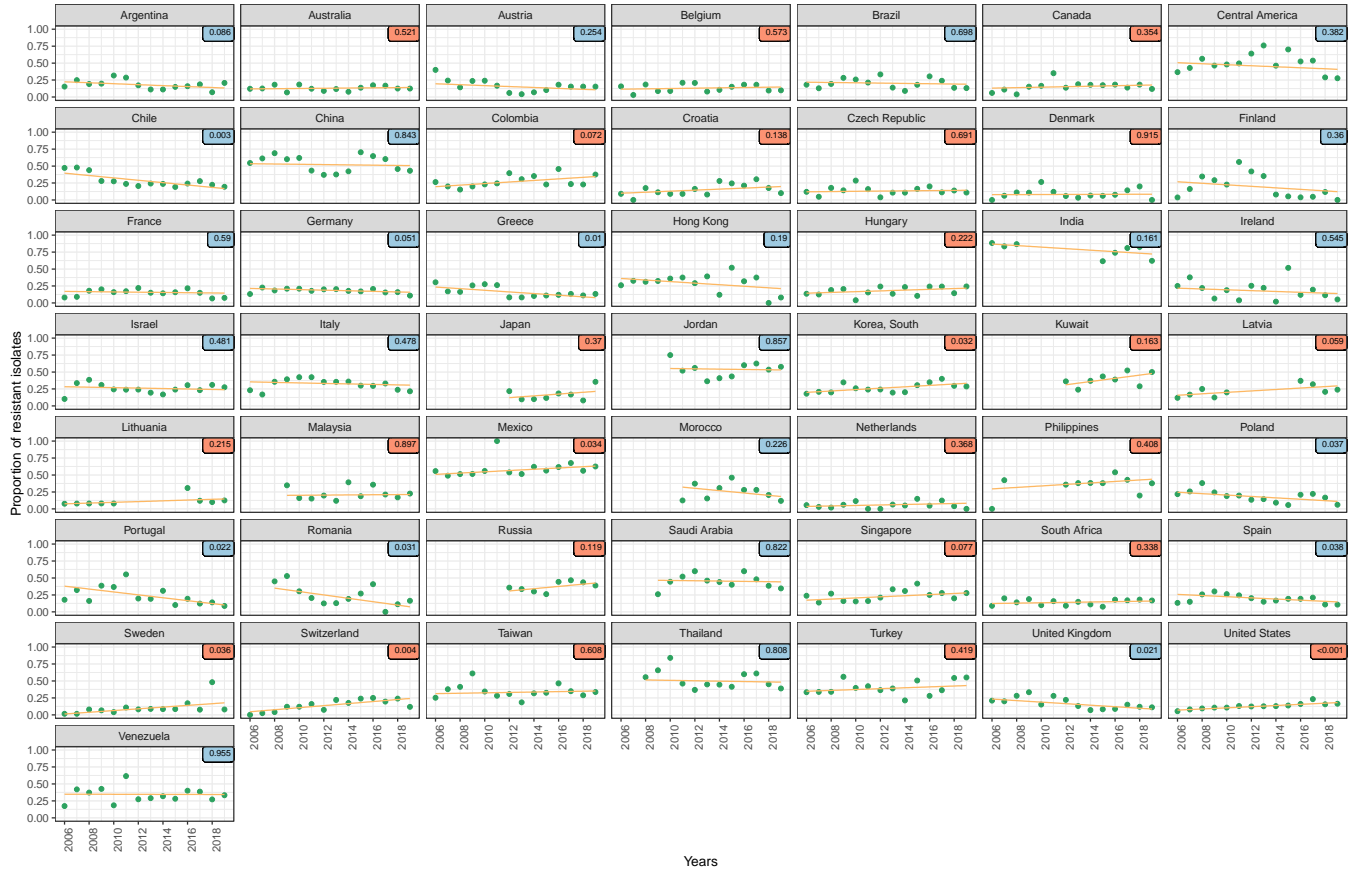

### D. 3GCR-Kp

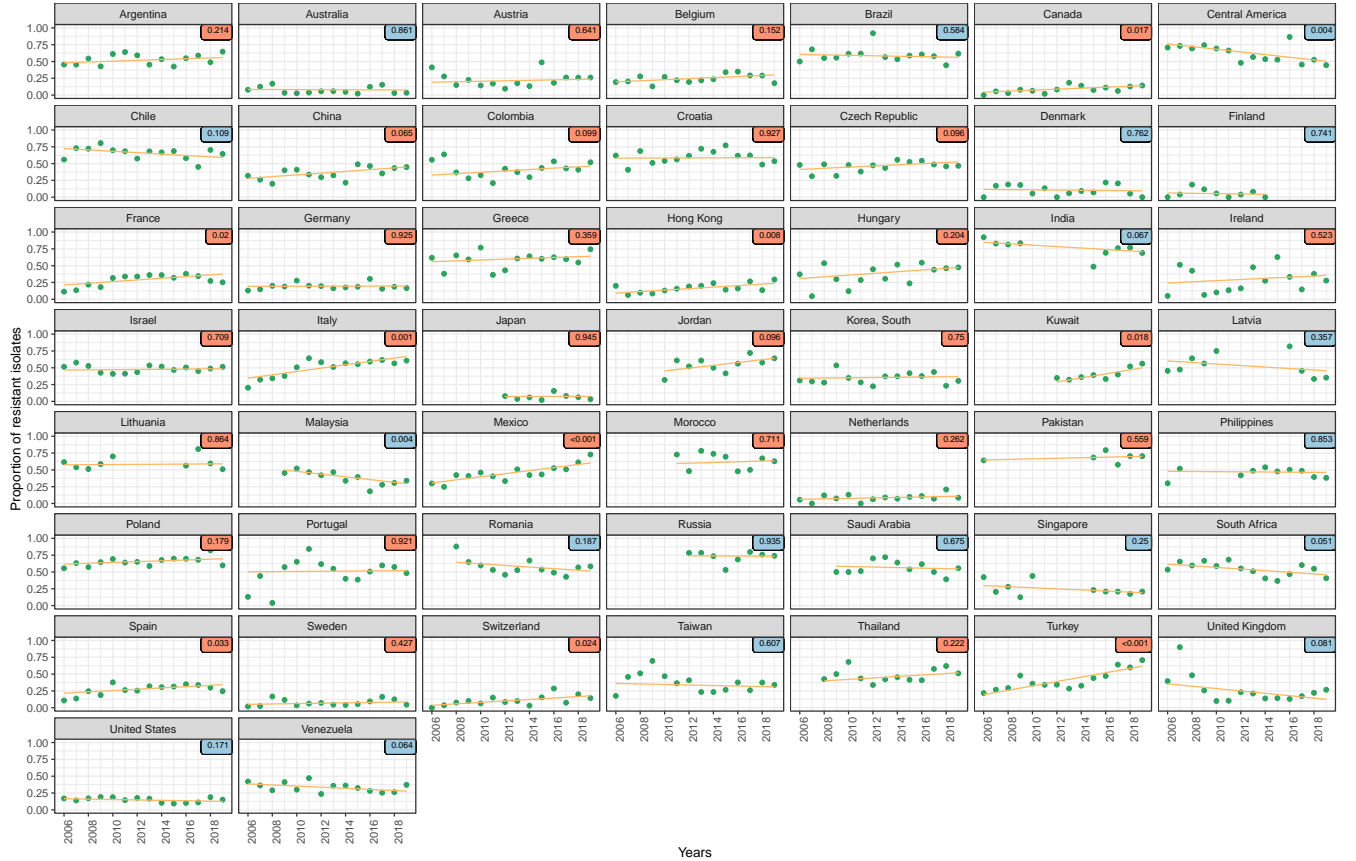



### E. CR-Kp

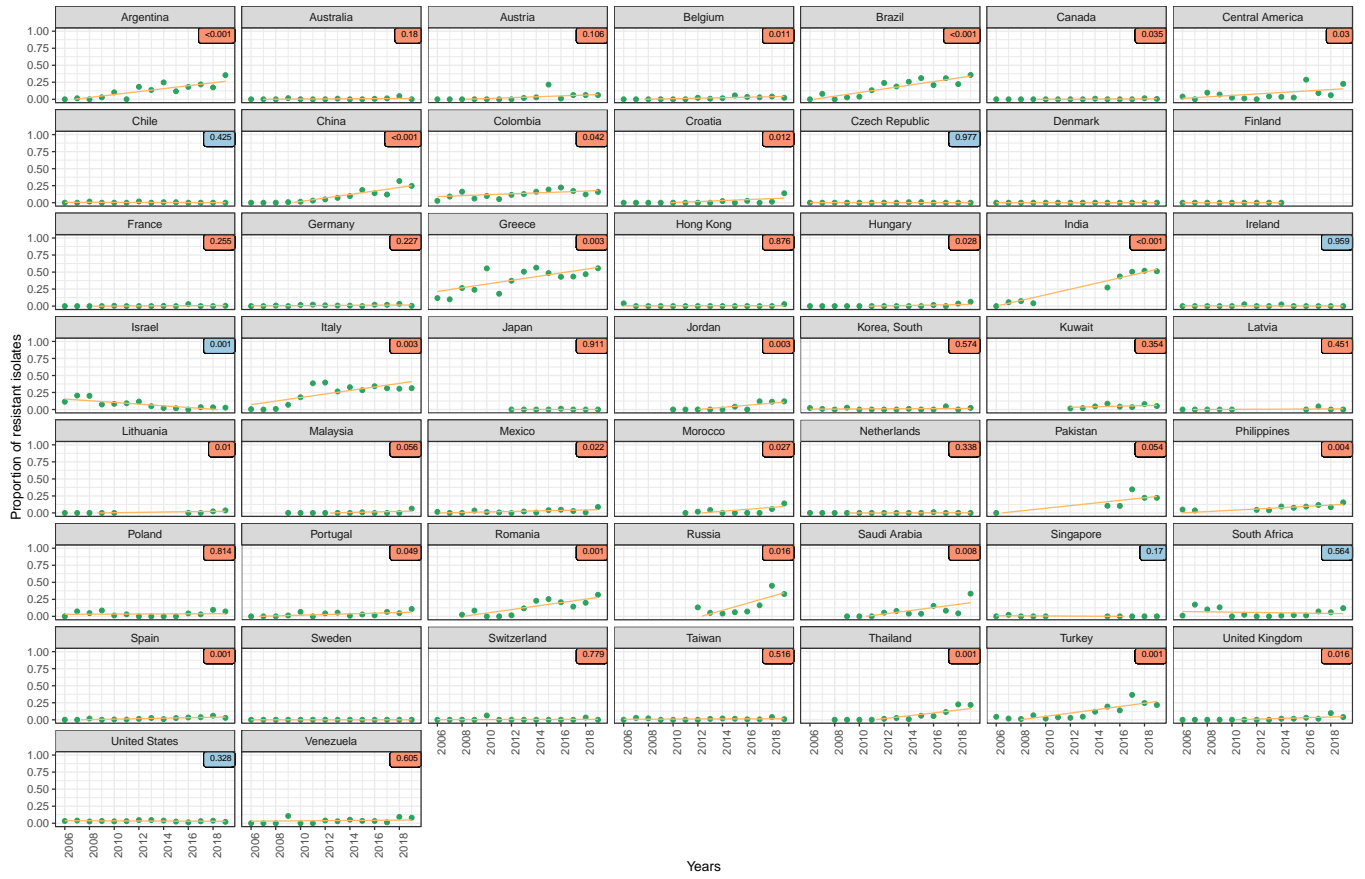

### F. CR-Pa

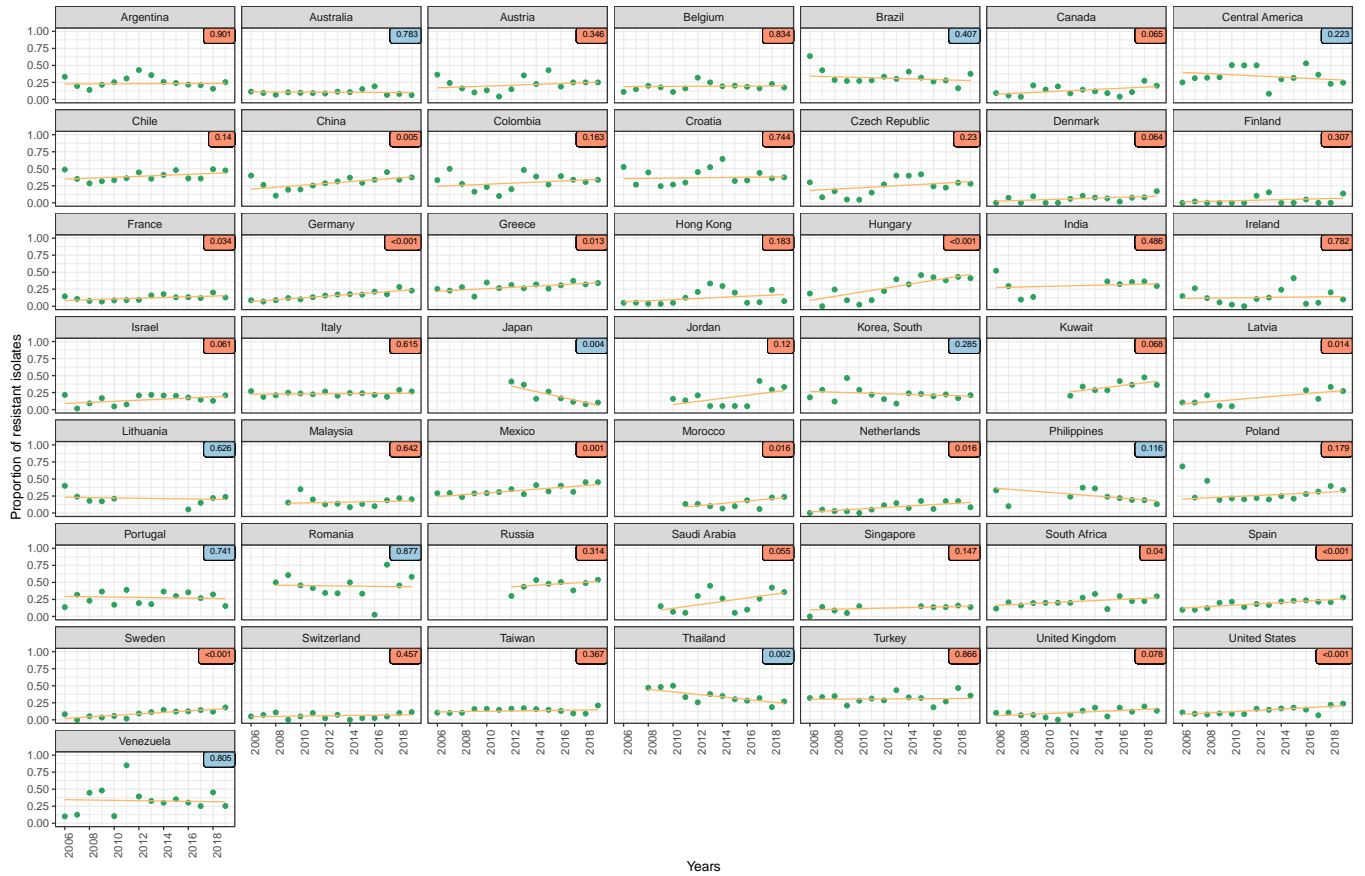

## G. CR-Ab

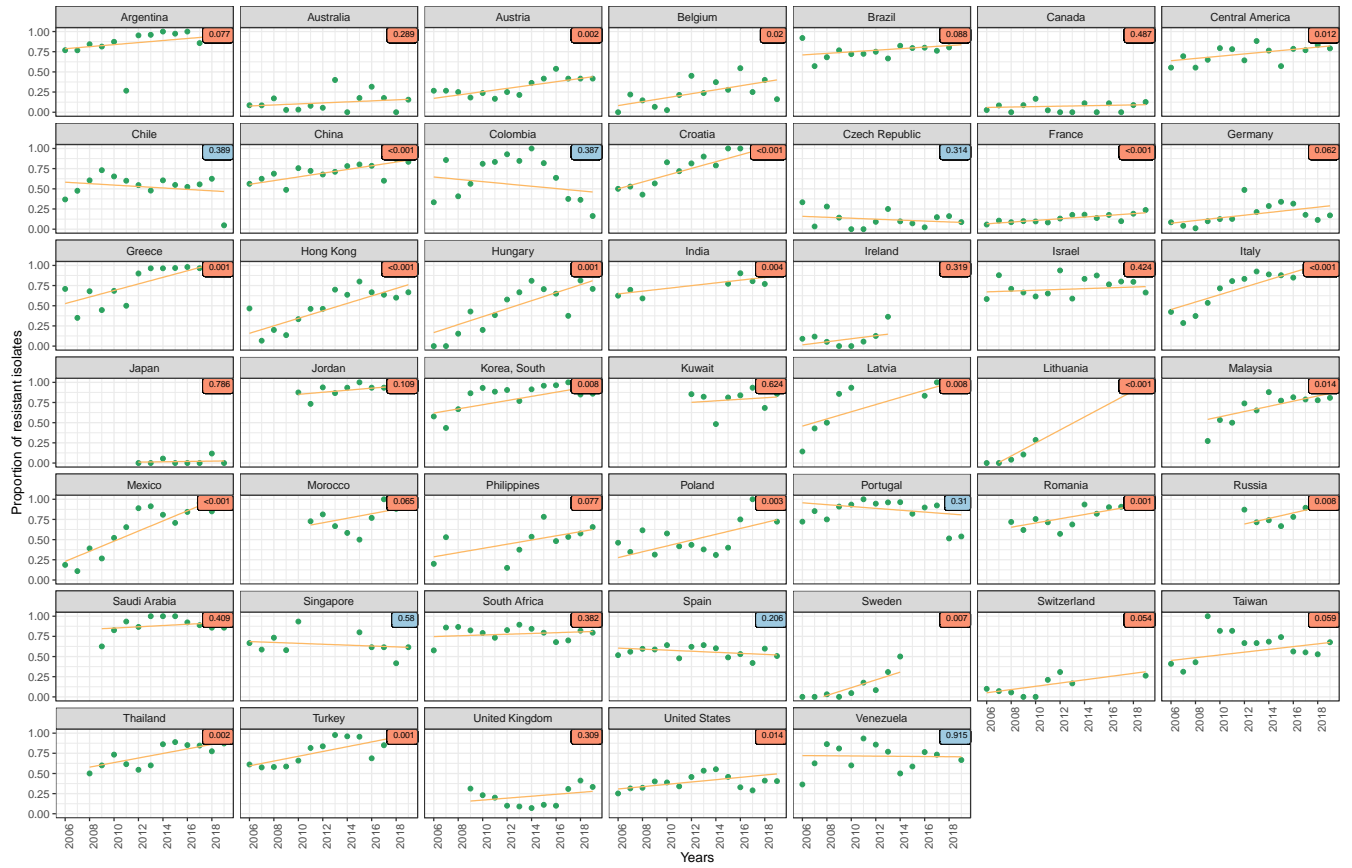

## H. VR-E

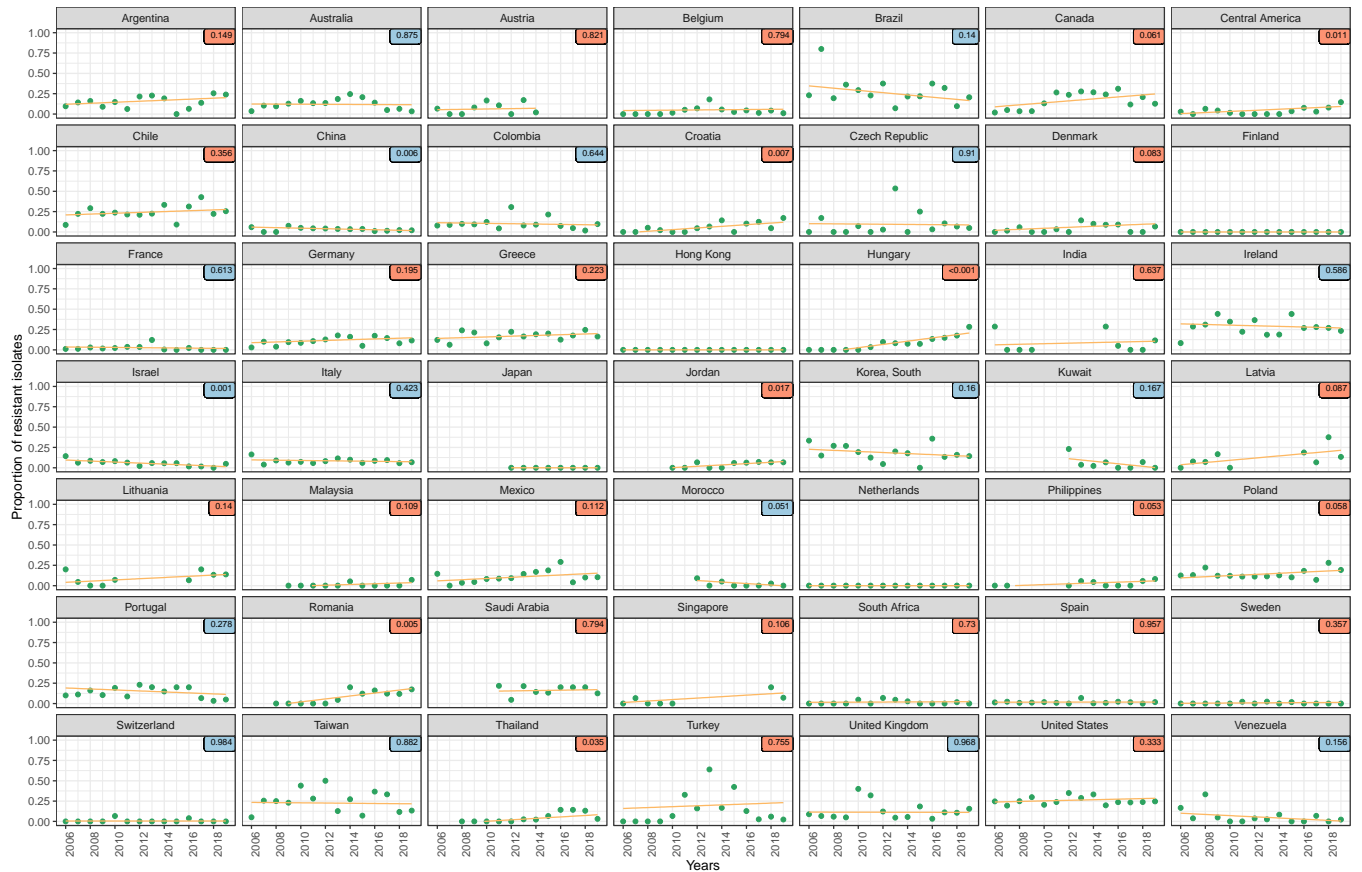

## I. PR-Sp

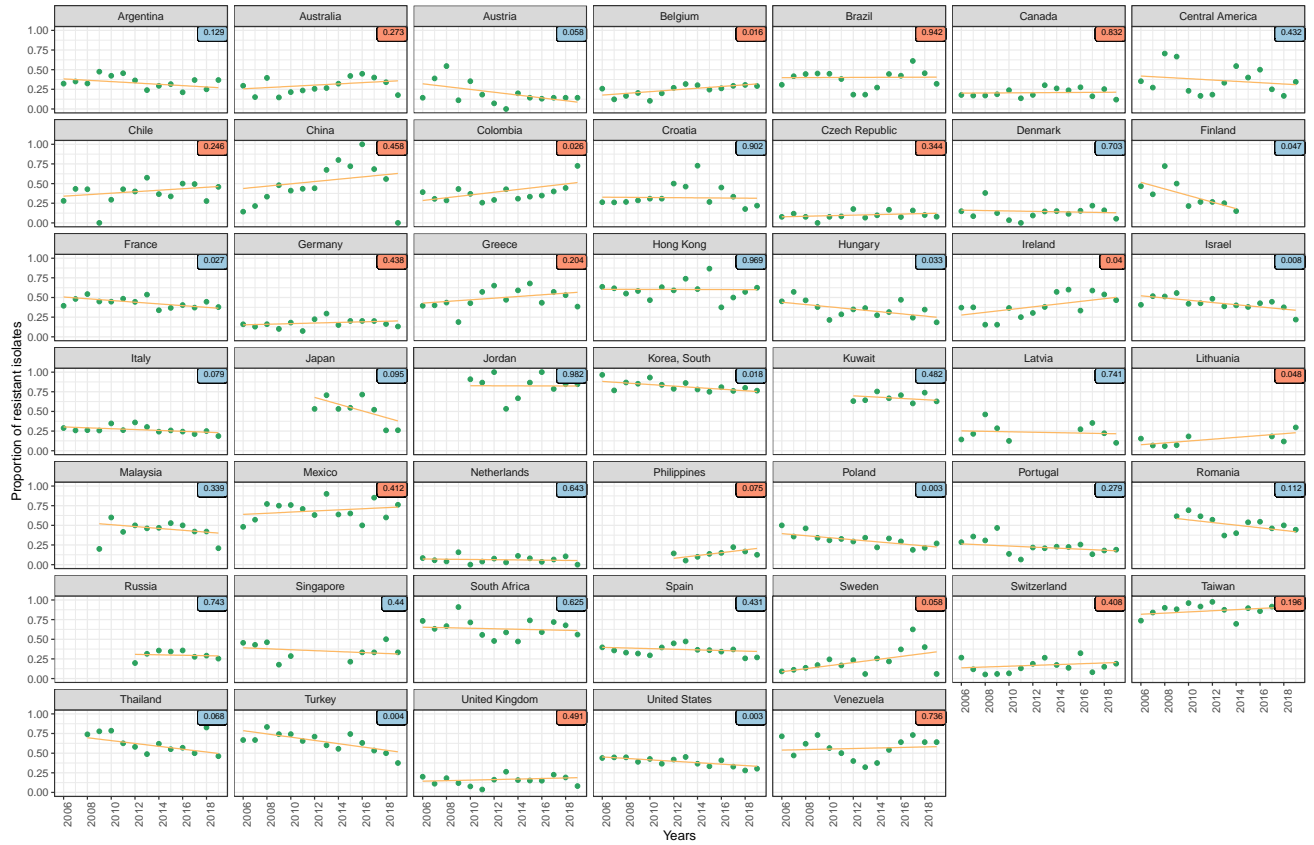

**Supplementary Figure S5. Temporal trends (2006-2019) per country, for all drug-bug pairs.**

Temporal trends for FR-*Ec* (A); APR-*Ec* (B); 3GCR-*Ec* (C); 3GCR-*Kp* (D); CR-*Kp* (E); CR-*Pa* (F); CR-*Ab* (G); VR-*E* (H); PR-*Sp* (I). Weighted linear regression temporal trends are shown in yellow (weights are the number of isolates tested per country and per year). P-values associated with the temporal trend are included on the top right. Blue color represents a decreasing trend. Red color represents an increasing trend. 95% confidence intervals (CI) around binomial proportions were calculated using Bayesian probability interval estimates with Jeffrey's prior. Number of countries included for each drug-bug pair were the following: 51 for 3GCR-*Kp* and CR-*Kp*; 50 for FR-*Ec*, APR-*Ec*, 3GCR-*Ec*, and CR-*Pa*; 49 for VR-*E*; 47 for CR-*Ab* and PR-*Sp*.

## A. FR-Ec

Fitted trajectories with 95% CI – FR-Ec

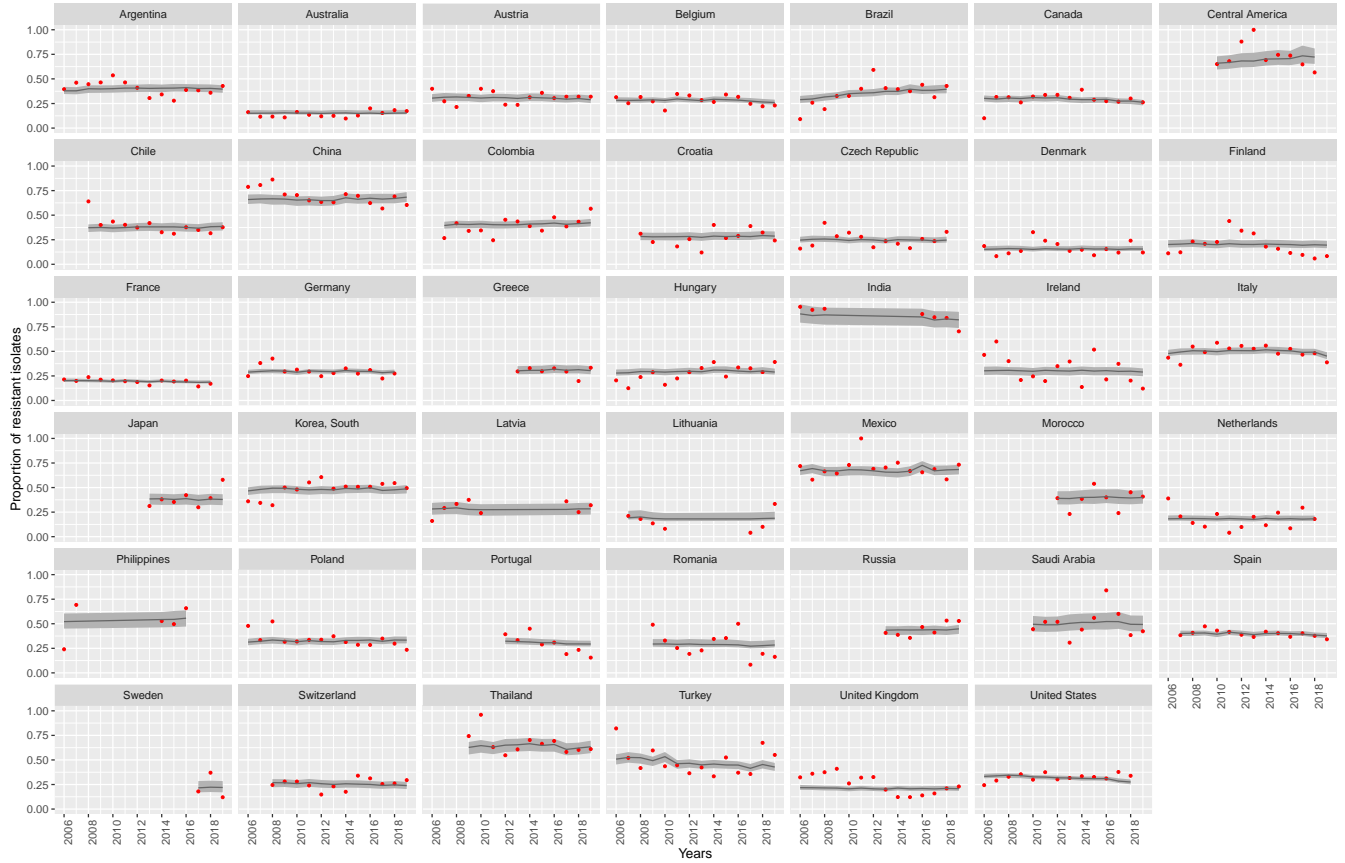

## B. APR-Ec

Fitted trajectories with 95% CI – APR-Ec

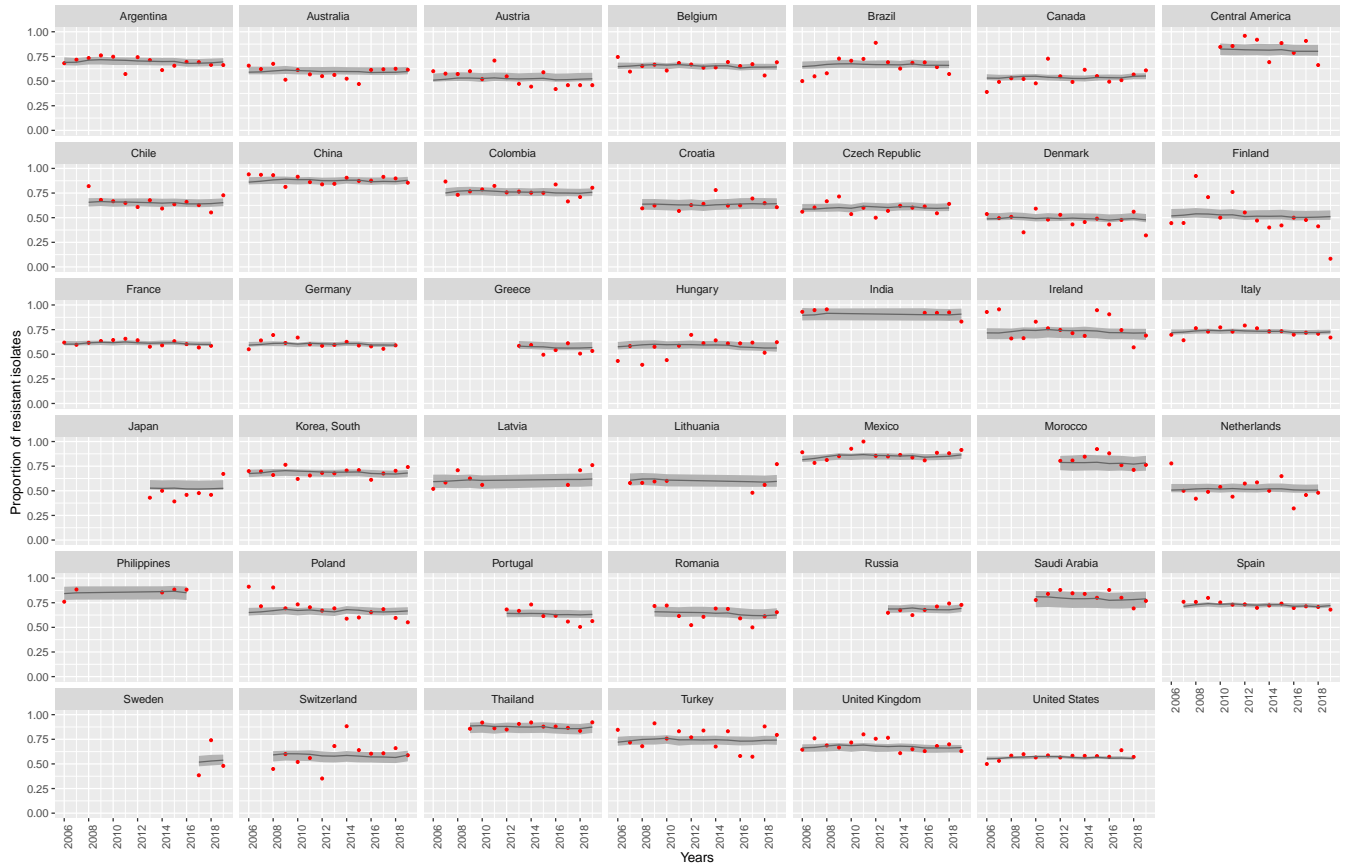

### C. 3GCR-Ec

Fitted trajectories with 95% CI – 3GCR-Ec

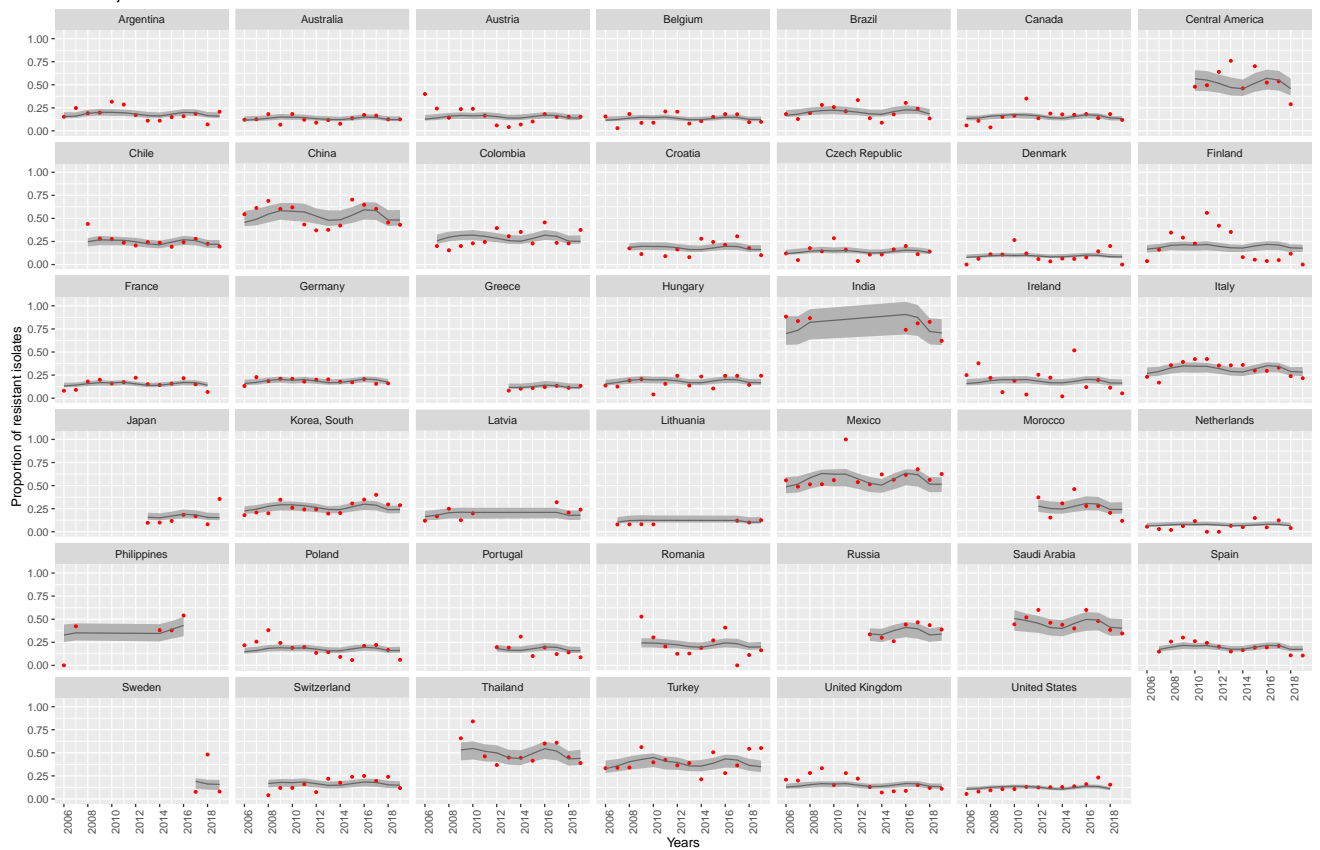

### D. 3GCR-Kp

Fitted trajectories with 95% CI – 3GCR-Kp

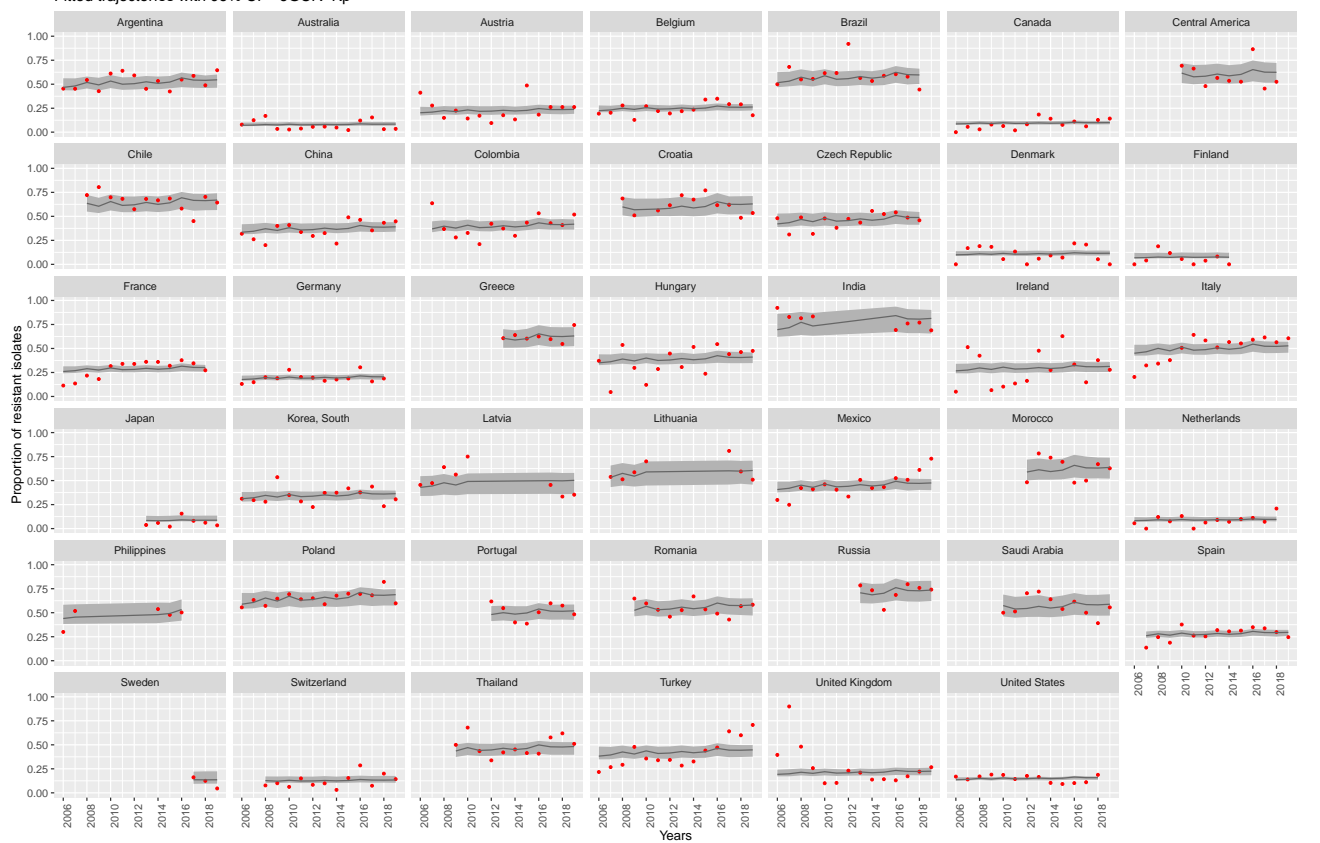

## E. CR-Kp

Fitted trajectories with 95% CI – CR-Kp

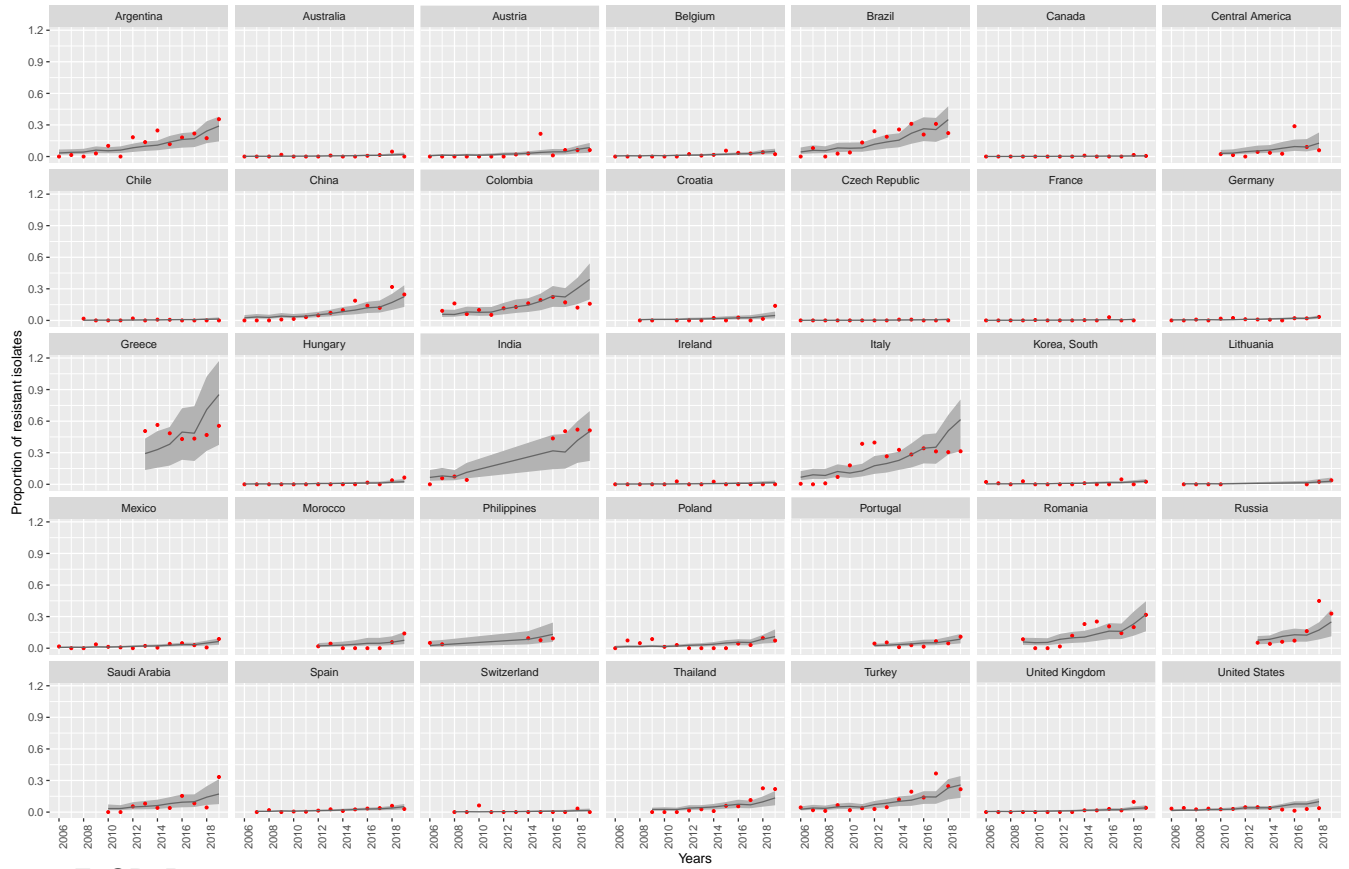

## F. CR-Pa

Fitted trajectories with 95% CI – CR-Pa

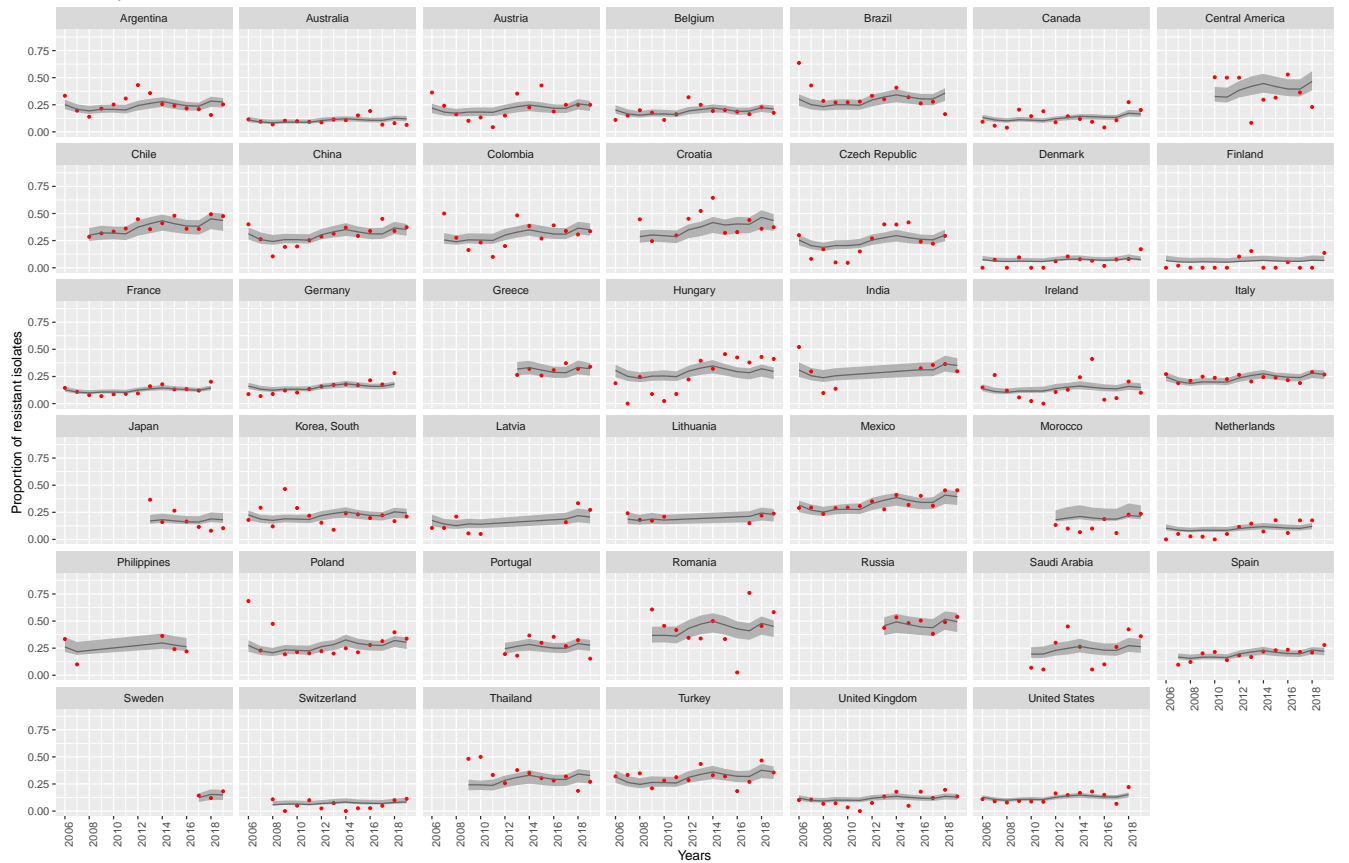

## G. CR-Ab

Fitted trajectories with 95% CI – CR-Ab

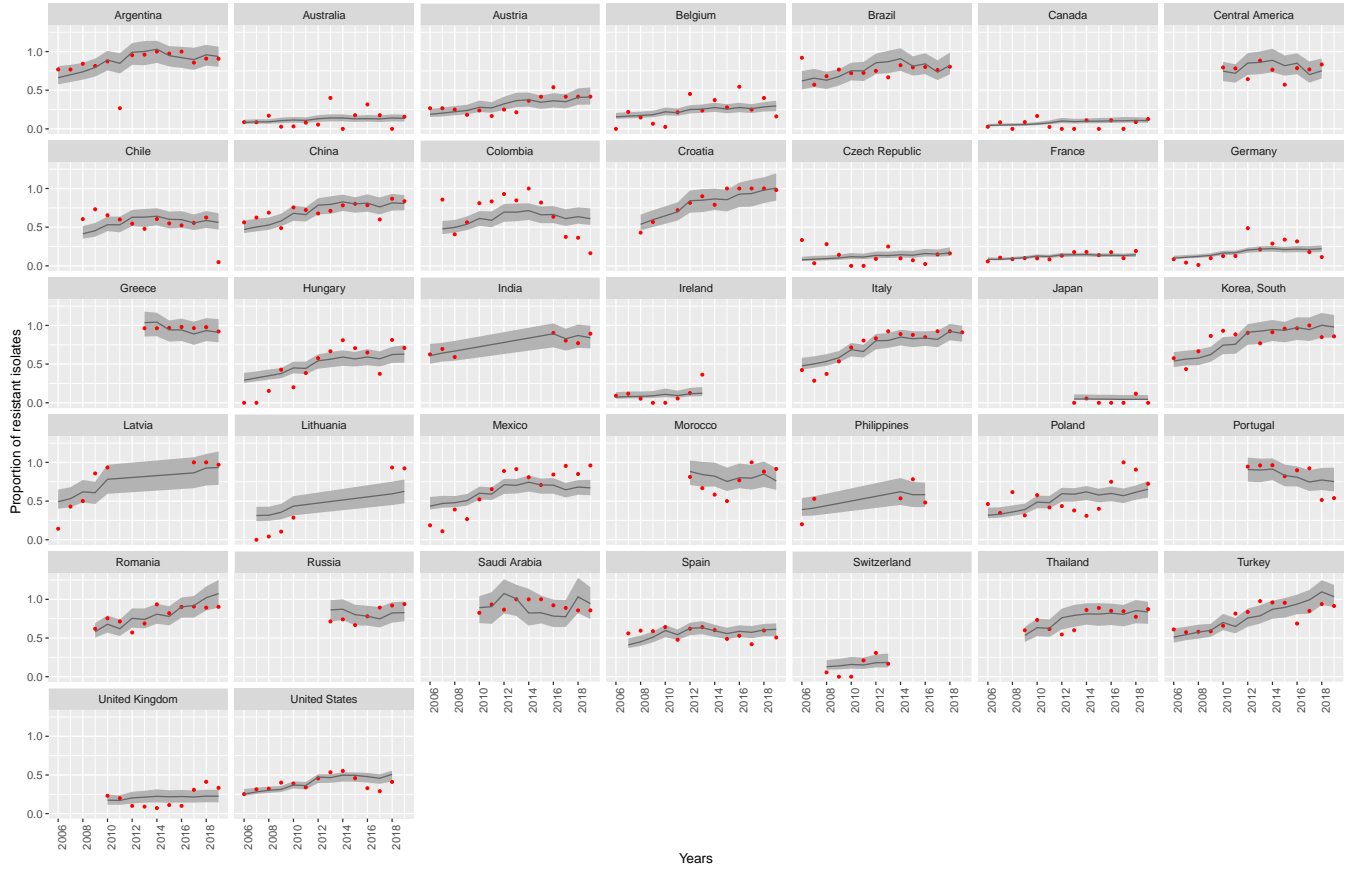

## H. VR-E

Fitted trajectories with 95% CI – VR-E

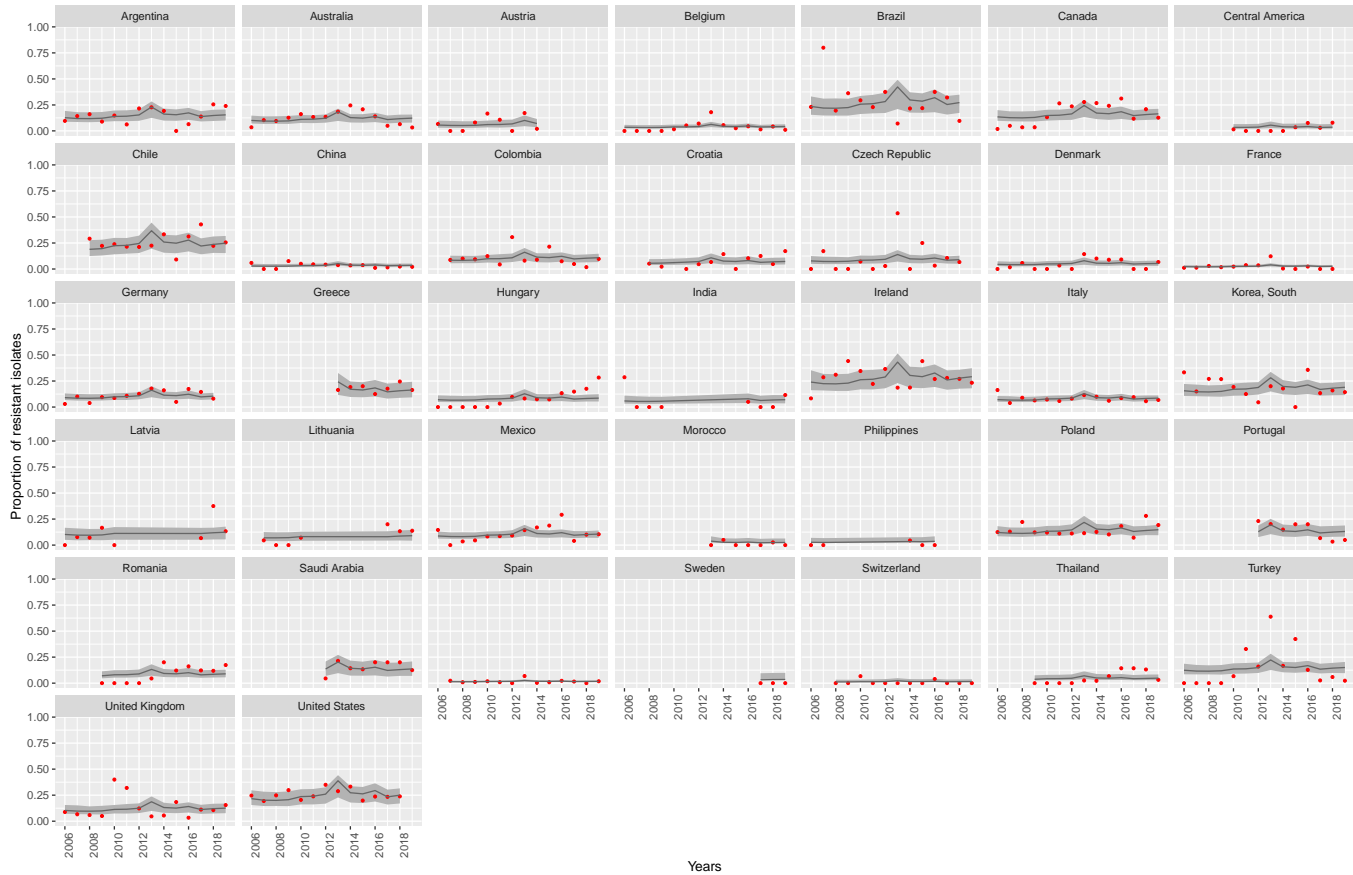

## I. PR-Sp

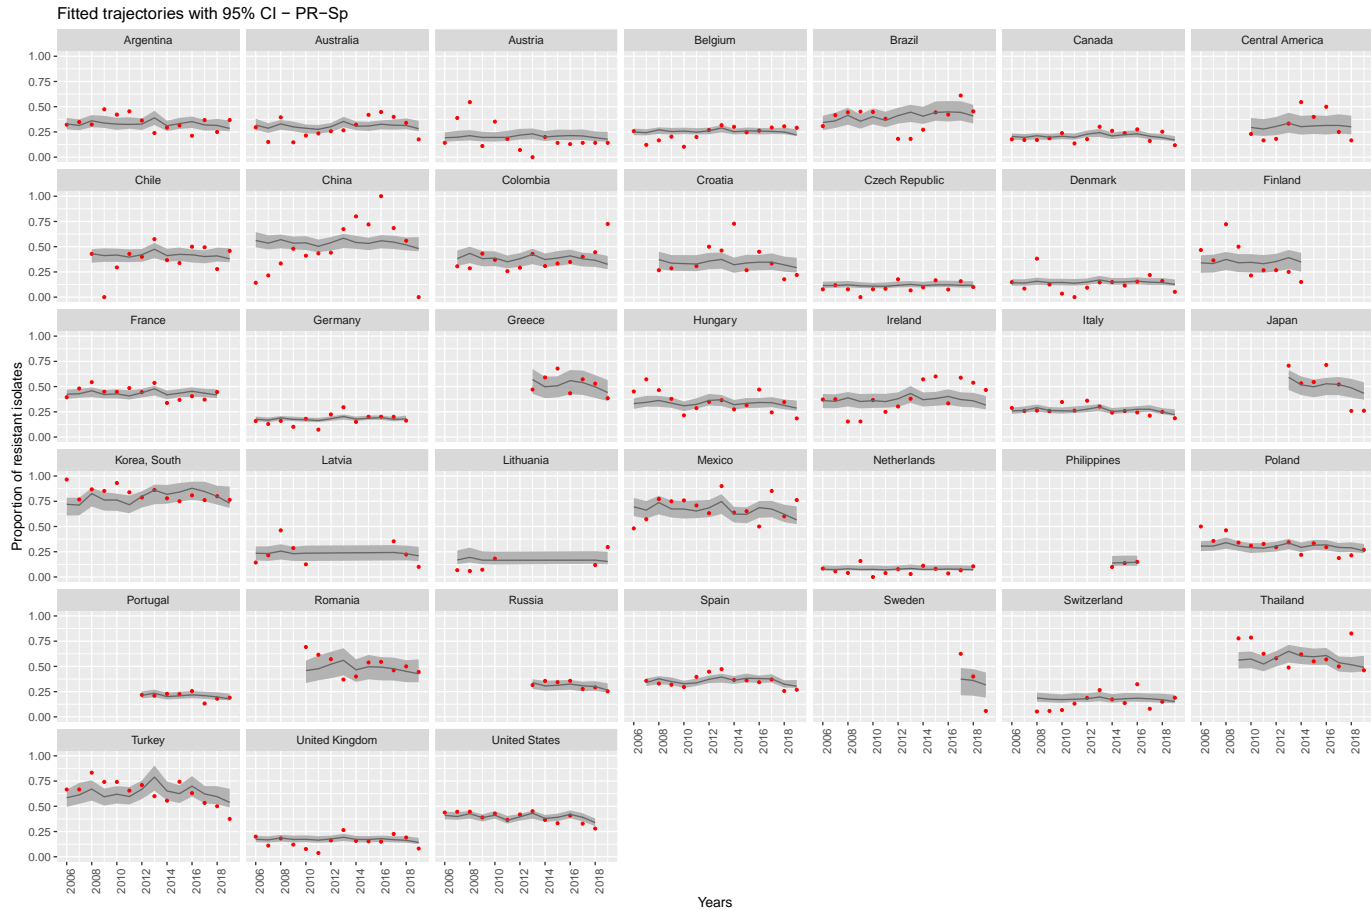

**Supplementary Figure S6. Observed vs fitted values by final multivariable models ( $M_{multi}$ ), for all drug-bug pairs.**

Plots for FR-*Ec* (A); APR-*Ec* (B); 3GCR-*Ec* (C); 3GCR-*Kp* (D); CR-*Kp* (E); CR-*Pa* (F); CR-*Ab* (G); VR-*E* (H); PR-*Sp* (I).

Red points are the observed ABR rates by country-year with corresponding 95% confidence intervals. Black lines are the fitted values by the final multivariable models  $M_{multi}$  specific to each drug-bug pair.

For each drug-bug pair, selected covariables are the following: for FR-*Ec*, quinolones sales, the GHS index, extreme climatic events, and average temperature; for APR-*Ec*, the GHS index, extreme climatic events, average temperature, and tourist departures; for 3GCR-*Ec*, the GHS index, extreme climatic events, and average temperature; for 3GCR-*Kp*, the GHS index; for CR-*Kp*, the GHS index, and average temperature; for CR-*Pa*, the GHS index, and tourist departures; for CR-*Ab*, carbapenems sales, global antibiotic sales, the GHS index, and the GDP; for VR-*E*, no covariables; for PR-*Sp*, global antibiotic sales and average relative humidity.



A.

|                       | Main analysis       |                | Sensitivity analysis 1 |                | Sensitivity analysis 2 |                | Sensitivity analysis 3 |                |
|-----------------------|---------------------|----------------|------------------------|----------------|------------------------|----------------|------------------------|----------------|
| Data                  | (n=471; C=41; Y=14) |                | (n=471; C=41; Y=14)    |                | (n=429; C=37; Y=14)    |                | (n=415; C=38; Y=14)    |                |
| Variable              | FE                  | RE *           | FE                     | RE *           | FE                     | RE *           | FE                     | RE *           |
|                       | <b>M_null</b>       |                |                        |                |                        |                |                        |                |
| $\hat{\beta}_0$       | 0.34<br>0.30-0.38   | 0.18<br>0.0005 | 0.34<br>0.29-0.38      | 0.18<br>0.0005 | 0.36<br>0.32-0.41      | 0.15<br>0.0008 | 0.34<br>0.29-0.39      | 0.19<br>0.0000 |
|                       | <b>M_uni</b>        |                |                        |                |                        |                |                        |                |
| ATB sales of interest | 1.11<br>1.06-1.17   | 0.17<br>0.0002 | 1.11<br>1.05-1.17      | 0.17<br>0.0002 | 1.10<br>1.05-1.16      | 0.15<br>0.0005 | 1.08<br>1.00-1.16      | 0.18<br>0.0000 |
| Global ATB sales      | 1.00<br>0.92-1.08   | 0.18<br>0.0005 | 1.00<br>0.92-1.08      | 0.18<br>0.0005 | 0.98<br>0.91-1.06      | 0.15<br>0.0008 | 0.98<br>0.88-1.09      | 0.19<br>0.0000 |
| GHS index             | 0.80<br>0.72-0.90   | 0.13<br>0.0005 | 0.80<br>0.72-0.90      | 0.13<br>0.0005 | 0.82<br>0.74-0.92      | 0.11<br>0.0008 | 0.77<br>0.68-0.87      | 0.12<br>0.0000 |
| GDP                   | 0.89<br>0.83-0.94   | 0.13<br>0.0002 | 0.89<br>0.84-0.94      | 0.13<br>0.0002 | 0.88<br>0.82-0.93      | 0.11<br>0.0005 | 0.86<br>0.80-0.94      | 0.13<br>0.0000 |
| Extreme events        | 1.20<br>1.06-1.35   | 0.15<br>0.0005 | 1.20<br>1.06-1.35      | 0.15<br>0.0005 | 1.18<br>1.05-1.33      | 0.13<br>0.0008 | 1.19<br>1.03-1.36      | 0.16<br>0.0000 |
| Temperature           | 1.21<br>1.11-1.32   | 0.11<br>0.0009 | 1.21<br>1.11-1.32      | 0.11<br>0.0009 | 1.20<br>1.10-1.31      | 0.09<br>0.0012 | 1.15<br>1.03-1.27      | 0.15<br>0.0000 |
| Rainfall              | 1.05<br>0.98-1.12   | 0.17<br>0.0004 | 1.05<br>0.98-1.11      | 0.17<br>0.0004 | 1.05<br>0.98-1.12      | 0.14<br>0.0007 | 1.05<br>0.95-1.15      | 0.18<br>0.0000 |
| Relative Humidity     | 0.93<br>0.86-1.00   | 0.15<br>0.0006 | 0.93<br>0.86-1.00      | 0.15<br>0.0006 | 0.95<br>0.87-1.02      | 0.13<br>0.0009 | 0.87<br>0.79-0.96      | 0.15<br>0.0006 |
| Population Density    | 1.04<br>0.92-1.18   | 0.17<br>0.0005 | 1.04<br>0.92-1.18      | 0.17<br>0.0005 | 1.09<br>0.97-1.22      | 0.14<br>0.0009 | 1.05<br>0.91-1.21      | 0.19<br>0.0000 |
| Tourist Arrivals      | 0.91<br>0.83-1.01   | 0.16<br>0.0003 | 0.91<br>0.83-1.01      | 0.16<br>0.0003 | 0.92<br>0.84-1.02      | 0.14<br>0.0006 | 0.88<br>0.78-0.99      | 0.18<br>0.0000 |
| Tourist Departures    | 0.90<br>0.83-0.97   | 0.14<br>0.0002 | 0.90<br>0.83-0.97      | 0.14<br>0.0002 | 0.91<br>0.84-0.98      | 0.12<br>0.0005 | 0.85<br>0.77-0.93      | 0.15<br>0.0000 |

\*spatial (top) and temporal (bottom) random effect

FR-EC

B.

|                       | Main analysis       |                | Sensitivity analysis 1 |                | Sensitivity analysis 2 |                | Sensitivity analysis 3 |                |
|-----------------------|---------------------|----------------|------------------------|----------------|------------------------|----------------|------------------------|----------------|
| Data                  | (n=471; C=41; Y=14) |                | (n=471; C=41; Y=14)    |                | (n=429; C=37; Y=14)    |                | (n=415; C=38; Y=14)    |                |
| Variable              | FE                  | RE *           | FE                     | RE *           | FE                     | RE *           | FE                     | RE *           |
|                       | <b>M_null</b>       |                |                        |                |                        |                |                        |                |
| $\hat{\beta}_0$       | 0.66<br>0.62-0.69   | 0.03<br>0.0003 | 0.66<br>0.62-0.69      | 0.03<br>0.0003 | 0.67<br>0.63-0.71      | 0.03<br>0.0003 | 0.66<br>0.63-0.70      | 0.02<br>0.0000 |
|                       | <b>M_uni</b>        |                |                        |                |                        |                |                        |                |
| ATB sales of interest | 0.98<br>0.94-1.02   | 0.03<br>0.0003 | 0.98<br>0.95-1.02      | 0.03<br>0.0004 | 0.98<br>0.94-1.02      | 0.03<br>0.0003 | 0.98<br>0.93-1.03      | 0.02<br>0.0000 |
| Global ATB sales      | 0.98<br>0.94-1.01   | 0.03<br>0.0003 | 0.98<br>0.94-1.01      | 0.03<br>0.0003 | 0.97<br>0.93-1.00      | 0.02<br>0.0003 | 0.97<br>0.93-1.02      | 0.02<br>0.0000 |
| GHS index             | 0.92<br>0.88-0.96   | 0.02<br>0.0003 | 0.92<br>0.88-0.96      | 0.02<br>0.0003 | 0.93<br>0.89-0.97      | 0.02<br>0.0003 | 0.90<br>0.86-0.95      | 0.01<br>0.0000 |
| GDP                   | 0.94<br>0.91-0.97   | 0.02<br>0.0003 | 0.94<br>0.91-0.97      | 0.02<br>0.0003 | 0.95<br>0.91-0.98      | 0.02<br>0.0003 | 0.93<br>0.89-0.97      | 0.01<br>0.0000 |
| Extreme events        | 1.09<br>1.04-1.14   | 0.02<br>0.0003 | 1.09<br>1.04-1.14      | 0.02<br>0.0003 | 1.08<br>1.03-1.14      | 0.02<br>0.0003 | 1.08<br>1.03-1.14      | 0.02<br>0.0000 |
| Temperature           | 1.09<br>1.05-1.13   | 0.02<br>0.0005 | 1.09<br>1.05-1.13      | 0.02<br>0.0005 | 1.08<br>1.04-1.12      | 0.02<br>0.0005 | 1.08<br>1.04-1.13      | 0.02<br>0.0000 |
| Rainfall              | 1.02<br>0.98-1.05   | 0.03<br>0.0003 | 1.02<br>0.99-1.05      | 0.03<br>0.0003 | 1.02<br>0.98-1.05      | 0.02<br>0.0003 | 1.02<br>0.97-1.07      | 0.02<br>0.0000 |
| Relative Humidity     | 0.95<br>0.92-0.99   | 0.02<br>0.0004 | 0.95<br>0.92-0.99      | 0.02<br>0.0004 | 0.96<br>0.92-1.00      | 0.02<br>0.0004 | 0.93<br>0.89-0.98      | 0.02<br>0.0000 |
| Population Density    | 1.00<br>0.96-1.06   | 0.03<br>0.0003 | 1.01<br>0.96-1.06      | 0.03<br>0.0003 | 1.03<br>0.98-1.08      | 0.02<br>0.0003 | 1.02<br>0.97-1.08      | 0.02<br>0.0000 |
| Tourist Arrivals      | 0.95<br>0.91-0.99   | 0.03<br>0.0002 | 0.95<br>0.91-0.99      | 0.03<br>0.0002 | 0.95<br>0.91-1.00      | 0.02<br>0.0002 | 0.95<br>0.90-1.00      | 0.02<br>0.0000 |
| Tourist Departures    | 0.92<br>0.89-0.95   | 0.02<br>0.0001 | 0.92<br>0.89-0.95      | 0.02<br>0.0001 | 0.92<br>0.89-0.96      | 0.02<br>0.0001 | 0.92<br>0.88-0.96      | 0.02<br>0.0000 |

\*spatial (top) and temporal (bottom) random effect

APR-EC

C.

3GCR-Ec

|                       | Main analysis       |                | Sensitivity analysis 1 |                | Sensitivity analysis 2 |                | Sensitivity analysis 3 |                |
|-----------------------|---------------------|----------------|------------------------|----------------|------------------------|----------------|------------------------|----------------|
| Data                  | (n=471; C=41; Y=14) |                | (n=471; C=41; Y=14)    |                | (n=429; C=37; Y=14)    |                | (n=415; C=38; Y=14)    |                |
| Variable              | FE                  | RE *           | FE                     | RE *           | FE                     | RE *           | FE                     | RE *           |
|                       | <b>M_null</b>       |                |                        |                |                        |                |                        |                |
| $\hat{\beta}_0$       | 0.34<br>0.30-0.38   | 0.18<br>0.0005 | 0.21<br>0.18-0.25      | 0.29<br>0.0116 | 0.23<br>0.19-0.27      | 0.24<br>0.0106 | 0.19<br>0.15-0.24      | 0.46<br>0.0095 |
|                       | <b>M_uni</b>        |                |                        |                |                        |                |                        |                |
| ATB sales of interest | 1.02<br>0.92-1.13   | 0.29<br>0.0116 | 1.02<br>0.92-1.13      | 0.29<br>0.012  | 0.99<br>0.90-1.09      | 0.24<br>0.0106 | 1.03<br>0.90-1.19      | 0.46<br>0.0090 |
| Global ATB sales      | 0.98<br>0.87-1.11   | 0.29<br>0.0117 | 0.98<br>0.87-1.11      | 0.29<br>0.0117 | 0.94<br>0.84-1.06      | 0.23<br>0.0108 | 0.97<br>0.82-1.15      | 0.45<br>0.0099 |
| GHS index             | 0.75<br>0.65-0.86   | 0.20<br>0.0115 | 0.75<br>0.65-0.86      | 0.20<br>0.0115 | 0.78<br>0.68-0.90      | 0.18<br>0.0105 | 0.69<br>0.57-0.83      | 0.31<br>0.0092 |
| GDP                   | 0.85<br>0.76-0.96   | 0.21<br>0.0123 | 0.85<br>0.76-0.96      | 0.21<br>0.0123 | 0.85<br>0.76-0.95      | 0.17<br>0.0105 | 0.83<br>0.67-0.99      | 0.32<br>0.0166 |
| Extreme events        | 1.30<br>1.12-1.52   | 0.22<br>0.0116 | 1.30<br>1.12-1.52      | 0.22<br>0.0116 | 1.28<br>1.11-1.48      | 0.18<br>0.0105 | 1.36<br>1.10-1.67      | 0.37<br>0.0094 |
| Temperature           | 1.28<br>1.13-1.44   | 0.19<br>0.0131 | 1.28<br>1.13-1.44      | 0.20<br>0.0131 | 1.26<br>1.12-1.42      | 0.17<br>0.0118 | 1.27<br>1.08-1.49      | 0.35<br>0.0088 |
| Rainfall              | 1.07<br>0.96-1.19   | 0.27<br>0.0114 | 1.07<br>0.96-1.20      | 0.27<br>0.0114 | 1.07<br>0.96-1.20      | 0.23<br>0.0104 | 1.04<br>0.90-1.21      | 0.45<br>0.0094 |
| Relative Humidity     | 0.86<br>0.77-0.97   | 0.22<br>0.0119 | 0.86<br>0.77-0.97      | 0.22<br>0.0119 | 0.89<br>0.79-1.00      | 0.19<br>0.0107 | 0.81<br>0.70-0.95      | 0.33<br>0.0092 |
| Population Density    | 1.01<br>0.86-1.19   | 0.29<br>0.0116 | 1.01<br>0.86-1.19      | 0.29<br>0.0116 | 1.09<br>0.93-1.27      | 0.24<br>0.0106 | 1.08<br>0.87-1.35      | 0.46<br>0.0090 |
| Tourist Arrivals      | 0.91<br>0.79-1.04   | 0.26<br>0.0113 | 0.91<br>0.79-1.04      | 0.27<br>0.0113 | 0.90<br>0.79-1.03      | 0.22<br>0.0102 | 0.84<br>0.70-1.01      | 0.42<br>0.0097 |
| Tourist Departures    | 0.85<br>0.76-0.95   | 0.23<br>0.0111 | 0.85<br>0.76-0.95      | 0.23<br>0.0111 | 0.87<br>0.77-0.97      | 0.21<br>0.0100 | 0.77<br>0.66-0.89      | 0.34<br>0.0104 |

\*spatial (top) and temporal (bottom) random effect

D.

3GCR-Kp

|                       | Main analysis       |                | Sensitivity analysis 1 |                | Sensitivity analysis 2 |                | Sensitivity analysis 3 |                |
|-----------------------|---------------------|----------------|------------------------|----------------|------------------------|----------------|------------------------|----------------|
| Data                  | (n=467; C=41; Y=14) |                | (n=443; C=39; Y=14)    |                | (n=425; C=37; Y=14)    |                | (n=406; C=37; Y=14)    |                |
| Variable              | FE                  | RE *           | FE                     | RE *           | FE                     | RE *           | FE                     | RE *           |
|                       | <b>M_null</b>       |                |                        |                |                        |                |                        |                |
| $\hat{\beta}_0$       | 0.32<br>0.25-0.40   | 0.50<br>0.0044 | 0.33<br>0.26-0.40      | 0.46<br>0.0043 | 0.33<br>0.26-0.41      | 0.46<br>0.0045 | 0.32<br>0.25-0.41      | 0.54<br>0.0044 |
|                       | <b>M_uni</b>        |                |                        |                |                        |                |                        |                |
| ATB sales of interest | 0.95<br>0.87-1.04   | 0.50<br>0.0046 | 0.97<br>0.88-1.07      | 0.46<br>0.0045 | 0.93<br>0.85-1.03      | 0.45<br>0.0048 | 1.09<br>0.95-1.26      | 0.56<br>0.0041 |
| Global ATB sales      | 1.05<br>0.93-1.17   | 0.50<br>0.0040 | 1.06<br>0.94-1.19      | 0.45<br>0.0038 | 1.04<br>0.92-1.17      | 0.46<br>0.0041 | 1.17<br>1.00-1.37      | 0.56<br>0.0031 |
| GHS index             | 0.61<br>0.52-0.71   | 0.24<br>0.0042 | 0.62<br>0.54-0.72      | 0.22<br>0.0041 | 0.63<br>0.54-0.74      | 0.24<br>0.0043 | 0.59<br>0.50-0.69      | 0.21<br>0.0043 |
| GDP                   | 1.02<br>0.86-1.20   | 0.52<br>0.0038 | 1.02<br>0.86-1.22      | 0.48<br>0.0035 | 1.08<br>0.92-1.28      | 0.55<br>0.0017 | 0.76<br>0.62-0.93      | 0.29<br>0.0187 |
| Extreme events        | 1.07<br>0.85-1.34   | 0.50<br>0.0044 | 1.06<br>0.84-1.32      | 0.46<br>0.0043 | 1.06<br>0.84-1.33      | 0.46<br>0.0045 | 1.07<br>0.83-1.37      | 0.54<br>0.0044 |
| Temperature           | 1.21<br>1.03-1.41   | 0.42<br>0.0040 | 1.21<br>1.04-1.41      | 0.38<br>0.0038 | 1.24<br>1.07-1.45      | 0.37<br>0.0039 | 1.32<br>1.11-1.57      | 0.42<br>0.0030 |
| Rainfall              | 1.01<br>0.92-1.11   | 0.50<br>0.0044 | 1.00<br>0.91-1.11      | 0.46<br>0.0043 | 1.01<br>0.91-1.11      | 0.46<br>0.0045 | 1.06<br>0.93-1.22      | 0.54<br>0.0044 |
| Relative Humidity     | 0.97<br>0.86-1.09   | 0.49<br>0.0044 | 0.96<br>0.85-1.08      | 0.44<br>0.0043 | 0.96<br>0.85-1.08      | 0.44<br>0.0044 | 0.92<br>0.79-1.06      | 0.50<br>0.0043 |
| Population Density    | 0.92<br>0.75-1.13   | 0.49<br>0.0047 | 0.90<br>0.73-1.09      | 0.44<br>0.0048 | 1.00<br>0.81-1.23      | 0.46<br>0.0045 | 0.96<br>0.76-1.22      | 0.54<br>0.0046 |
| Tourist Arrivals      | 1.04<br>0.90-1.20   | 0.50<br>0.0040 | 1.03<br>0.89-1.20      | 0.46<br>0.0040 | 1.09<br>0.94-1.27      | 0.46<br>0.0036 | 0.99<br>0.82-1.19      | 0.54<br>0.0045 |
| Tourist Departures    | 0.93<br>0.83-1.05   | 0.47<br>0.0050 | 0.94<br>0.84-1.06      | 0.43<br>0.0049 | 0.91<br>0.81-1.03      | 0.41<br>0.0054 | 0.82<br>0.71-0.96      | 0.43<br>0.0065 |

\*spatial (top) and temporal (bottom) random effect

E.

|                       | Main analysis       |                | Sensitivity analysis 1 |                | Sensitivity analysis 2 |                | Sensitivity analysis 3 |                |
|-----------------------|---------------------|----------------|------------------------|----------------|------------------------|----------------|------------------------|----------------|
| Data                  | (n=413; C=35; Y=14) |                | (n=390; C=33; Y=14)    |                | (n=406; C=34; Y=14)    |                | (n=295; C=27; Y=14)    |                |
| Variable              | FE                  | RE *           | FE                     | RE *           | FE                     | RE *           | FE                     | RE *           |
|                       | <b>M_null</b>       |                |                        |                |                        |                |                        |                |
| $\hat{\beta}_0$       | 0.02<br>0.01-0.04   | 1.92<br>0.5321 | 0.02<br>0.01-0.05      | 1.89<br>0.5751 | 0.02<br>0.01-0.04      | 1.93<br>0.5278 | 0.04<br>0.02-0.08      | 1.22<br>0.4539 |
|                       | <b>M_uni</b>        |                |                        |                |                        |                |                        |                |
| ATB sales of interest | 1.20<br>0.90-1.60   | 2.1<br>0.4722  | 1.18<br>0.88-1.59      | 2.06<br>0.5195 | 1.19<br>0.89-1.60      | 2.11<br>0.4703 | 0.97<br>0.69-1.36      | 1.20<br>0.4631 |
| Global ATB sales      | 1.20<br>0.84-1.71   | 1.94<br>0.5181 | 1.13<br>0.79-1.62      | 1.91<br>0.5643 | 1.20<br>0.84-1.71      | 1.95<br>0.5141 | 1.27<br>0.84-1.92      | 1.33<br>0.4296 |
| GHS index             | 0.54<br>0.36-0.82   | 1.51<br>0.5202 | 0.55<br>0.36-0.84      | 1.50<br>0.5622 | 0.53<br>0.35-0.81      | 1.49<br>0.5159 | 0.56<br>0.38-0.82      | 0.87<br>0.4332 |
| GDP                   | 0.56<br>0.39-0.80   | 1.43<br>0.7466 | 0.61<br>0.42-0.88      | 1.48<br>0.7627 | 0.55<br>0.38-0.79      | 1.43<br>0.7443 | 0.60<br>0.41-0.88      | 0.92<br>0.6010 |
| Extreme events        | 1.36<br>0.85-2.19   | 1.83<br>0.5308 | 1.33<br>0.82-2.16      | 1.81<br>0.5740 | 1.35<br>0.84-2.18      | 1.84<br>0.5266 | 1.25<br>0.80-1.95      | 1.17<br>0.4527 |
| Temperature           | 1.95<br>1.37-2.78   | 1.33<br>0.4900 | 1.84<br>1.28-2.65      | 1.37<br>0.5343 | 1.92<br>1.34-2.75      | 1.36<br>0.4866 | 1.40<br>0.97-2.01      | 1.09<br>0.4381 |
| Rainfall              | 1.35<br>1.00-1.83   | 1.83<br>0.5547 | 1.38<br>1.01-1.88      | 1.80<br>0.5991 | 1.35<br>0.88-1.84      | 1.85<br>0.5500 | 1.05<br>0.72-1.51      | 1.22<br>0.4563 |
| Relative Humidity     | 0.87<br>0.61-1.24   | 1.83<br>0.5296 | 0.90<br>0.63-1.29      | 1.83<br>0.5735 | 0.89<br>0.62-1.27      | 1.86<br>0.5257 | 0.66<br>0.47-0.95      | 1.09<br>0.4626 |
| Population Density    | 1.12<br>0.71-1.77   | 1.92<br>0.5269 | 1.12<br>0.70-1.79      | 1.90<br>0.5693 | 1.10<br>0.59-1.74      | 1.93<br>0.5233 | 0.96<br>0.61-1.50      | 1.22<br>0.4555 |
| Tourist Arrivals      | 0.86<br>0.58-1.27   | 1.83<br>0.5439 | 0.85<br>0.57-1.27      | 1.79<br>0.5870 | 0.86<br>0.58-1.27      | 1.83<br>0.5393 | 1.01<br>0.67-1.51      | 1.23<br>0.4533 |
| Tourist Departures    | 0.67<br>0.46-0.97   | 1.52<br>0.5667 | 0.73<br>0.51-1.05      | 1.60<br>0.6072 | 0.68<br>0.46-0.99      | 1.55<br>0.5602 | 0.74<br>0.51-1.08      | 1.05<br>0.4849 |

\*spatial (top) and temporal (bottom) random effect

F.

|                       | Main analysis       |                | Sensitivity analysis 1 |                | Sensitivity analysis 2 |                | Sensitivity analysis 3 |                |
|-----------------------|---------------------|----------------|------------------------|----------------|------------------------|----------------|------------------------|----------------|
| Data                  | (n=472; C=41; Y=14) |                | (n=444; C=39; Y=14)    |                | (n=430; C=37; Y=14)    |                | (n=356; C=32; Y=14)    |                |
| Variable              | FE                  | RE *           | FE                     | RE *           | FE                     | RE *           | FE                     | RE *           |
|                       | <b>M_null</b>       |                |                        |                |                        |                |                        |                |
| $\hat{\beta}_0$       | 0.20<br>0.17-0.24   | 0.27<br>0.0223 | 0.20<br>0.17-0.24      | 0.27<br>0.0229 | 0.21<br>0.18-0.25      | 0.24<br>0.0206 | 0.19<br>0.15-0.23      | 0.30<br>0.0231 |
|                       | <b>M_uni</b>        |                |                        |                |                        |                |                        |                |
| ATB sales of interest | 0.97<br>0.90-1.04   | 0.26<br>0.0247 | 0.96<br>0.89-1.04      | 0.26<br>0.0257 | 0.97<br>0.89-1.04      | 0.23<br>0.0228 | 0.96<br>0.82-1.11      | 0.29<br>0.0262 |
| Global ATB sales      | 0.91<br>0.80-1.03   | 0.29<br>0.0238 | 0.91<br>0.80-1.03      | 0.29<br>0.0246 | 0.89<br>0.79-1.00      | 0.25<br>0.0222 | 1.02<br>0.85-1.22      | 0.30<br>0.0229 |
| GHS index             | 0.71<br>0.63-0.79   | 0.13<br>0.0218 | 0.69<br>0.62-0.77      | 0.12<br>0.0227 | 0.73<br>0.65-0.82      | 0.13<br>0.0201 | 0.67<br>0.57-0.77      | 0.13<br>0.0191 |
| GDP                   | 0.89<br>0.77-1.04   | 0.20<br>0.0303 | 0.88<br>0.74-1.05      | 0.18<br>0.0323 | 0.89<br>0.77-1.04      | 0.17<br>0.0276 | 0.85<br>0.69-1.06      | 0.20<br>0.0382 |
| Extreme events        | 1.11<br>0.94-1.31   | 0.26<br>0.0223 | 1.10<br>0.93-1.31      | 0.26<br>0.0230 | 1.09<br>0.92-1.28      | 0.24<br>0.0206 | 0.99<br>0.79-1.23      | 0.30<br>0.0231 |
| Temperature           | 1.24<br>1.09-1.41   | 0.23<br>0.0199 | 1.24<br>1.09-1.42      | 0.23<br>0.0206 | 1.21<br>1.06-1.39      | 0.21<br>0.0185 | 1.18<br>0.98-1.42      | 0.28<br>0.0196 |
| Rainfall              | 1.10<br>0.99-1.22   | 0.26<br>0.0229 | 1.10<br>0.99-1.22      | 0.26<br>0.0235 | 1.09<br>0.98-1.21      | 0.24<br>0.0210 | 0.96<br>0.80-1.15      | 0.30<br>0.0229 |
| Relative Humidity     | 0.89<br>0.80-1.00   | 0.23<br>0.0220 | 0.89<br>0.80-1.00      | 0.23<br>0.0227 | 0.91<br>0.81-1.03      | 0.22<br>0.0204 | 0.76<br>0.65-0.89      | 0.24<br>0.0200 |
| Population Density    | 0.94<br>0.80-1.10   | 0.27<br>0.0227 | 0.92<br>0.78-1.08      | 0.26<br>0.0234 | 0.97<br>0.83-1.13      | 0.24<br>0.0207 | 1.03<br>0.84-1.26      | 0.30<br>0.0229 |
| Tourist Arrivals      | 1.10<br>0.96-1.26   | 0.28<br>0.0209 | 1.09<br>0.95-1.25      | 0.27<br>0.0217 | 1.12<br>0.98-1.28      | 0.24<br>0.0190 | 1.12<br>0.93-1.35      | 0.29<br>0.0203 |
| Tourist Departures    | 0.86<br>0.77-0.96   | 0.21<br>0.0244 | 0.86<br>0.77-0.96      | 0.20<br>0.0251 | 0.87<br>0.78-0.97      | 0.19<br>0.0222 | 0.89<br>0.74-1.07      | 0.27<br>0.0261 |

\*spatial (top) and temporal (bottom) random effect

G.

CR-Ab

|                       | Main analysis       |                | Sensitivity analysis 1 |                | Sensitivity analysis 2 |                | Sensitivity analysis 3 |                |
|-----------------------|---------------------|----------------|------------------------|----------------|------------------------|----------------|------------------------|----------------|
| Data                  | (n=410; C=37; Y=14) |                | (n=272; C=28; Y=14)    |                | (n=396; C=35; Y=14)    |                | (n=292; C=29; Y=14)    |                |
| Variable              | FE                  | RE *           | FE                     | RE *           | FE                     | RE *           | FE                     | RE *           |
|                       | <b>M_null</b>       |                |                        |                |                        |                |                        |                |
| $\hat{\beta}_0$       | 0.41<br>0.30-0.54   | 0.67<br>0.0446 | 0.47<br>0.36-0.63      | 0.47<br>0.0394 | 0.40<br>0.29-0.54      | 0.71<br>0.0387 | 0.38<br>0.27-0.54      | 0.72<br>0.0366 |
|                       | <b>M_uni</b>        |                |                        |                |                        |                |                        |                |
| ATB sales of interest | 1.13<br>1.04-1.24   | 0.77<br>0.0328 | 1.17<br>1.07-1.27      | 0.15<br>0.0450 | 1.12<br>1.03-1.22      | 0.79<br>0.0293 | 1.14<br>0.97-1.33      | 0.80<br>0.0258 |
| Global ATB sales      | 0.84<br>0.74-0.96   | 0.74<br>0.0509 | 0.81<br>0.69-0.94      | 0.51<br>0.0468 | 0.83<br>0.73-0.95      | 0.78<br>0.0448 | 0.82<br>0.65-1.03      | 0.77<br>0.0422 |
| GHS index             | 0.69<br>0.55-0.88   | 0.52<br>0.0442 | 0.73<br>0.59-0.91      | 0.37<br>0.0390 | 0.68<br>0.53-0.87      | 0.54<br>0.0384 | 0.57<br>0.44-0.73      | 0.39<br>0.0348 |
| GDP                   | 1.25<br>1.02-1.54   | 0.98<br>0.0258 | 1.21<br>0.98-1.49      | 0.68<br>0.0246 | 1.15<br>0.93-1.41      | 0.89<br>0.0279 | 0.82<br>0.60-1.12      | 0.49<br>0.0545 |
| Extreme events        | 1.13<br>0.86-1.50   | 0.66<br>0.0446 | 1.08<br>0.84-1.37      | 0.47<br>0.0394 | 1.15<br>0.86-1.54      | 0.69<br>0.0387 | 1.09<br>0.81-1.47      | 0.71<br>0.0366 |
| Temperature           | 1.21<br>1.00-1.46   | 0.57<br>0.0429 | 1.17<br>0.99-1.38      | 0.39<br>0.0382 | 1.22<br>1.01-1.49      | 0.58<br>0.0371 | 1.39<br>1.12-1.72      | 0.54<br>0.0342 |
| Rainfall              | 1.00<br>0.89-1.12   | 0.67<br>0.0446 | 0.99<br>0.88-1.11      | 0.47<br>0.0394 | 1.01<br>0.90-1.13      | 0.71<br>0.0387 | 1.01<br>0.83-1.23      | 0.71<br>0.0366 |
| Relative Humidity     | 0.94<br>0.82-1.08   | 0.64<br>0.0447 | 0.97<br>0.85-1.11      | 0.46<br>0.0395 | 0.95<br>0.83-1.09      | 0.67<br>0.0388 | 0.81<br>0.67-0.99      | 0.58<br>0.0404 |
| Population Density    | 0.86<br>0.67-1.10   | 0.67<br>0.0464 | 1.06<br>0.83-1.37      | 0.47<br>0.0386 | 0.91<br>0.70-1.18      | 0.70<br>0.0398 | 1.03<br>0.78-1.37      | 0.72<br>0.0363 |
| Tourist Arrivals      | 1.22<br>1.04-1.45   | 0.71<br>0.0410 | 1.12<br>0.95-1.33      | 0.49<br>0.0379 | 1.18<br>0.99-1.40      | 0.73<br>0.0365 | 1.08<br>0.86-1.36      | 0.72<br>0.0355 |
| Tourist Departures    | 0.95<br>0.84-1.08   | 0.64<br>0.0454 | 0.89<br>0.79-1.01      | 0.42<br>0.0410 | 0.89<br>0.78-1.01      | 0.63<br>0.0406 | 0.81<br>0.67-0.98      | 0.59<br>0.0377 |

\*spatial (top) and temporal (bottom) random effect

H.

VR-E

|                       | Main analysis       |                | Sensitivity analysis 1 |                | Sensitivity analysis 2 |                | Sensitivity analysis 3 |                |
|-----------------------|---------------------|----------------|------------------------|----------------|------------------------|----------------|------------------------|----------------|
| Data                  | (n=423; C=37; Y=14) |                | (n=325; C=28; Y=14)    |                | (n=394; C=34; Y=14)    |                | (n=333; C=30; Y=14)    |                |
| Variable              | FE                  | RE *           | FE                     | RE *           | FE                     | RE *           | FE                     | RE *           |
|                       | <b>M_null</b>       |                |                        |                |                        |                |                        |                |
| $\hat{\beta}_0$       | 0.08<br>0.06-0.11   | 0.67<br>0.0430 | 0.10<br>0.07-0.13      | 0.53<br>0.0310 | 0.08<br>0.06-0.11      | 0.73<br>0.0364 | 0.09<br>0.06-0.13      | 0.77<br>0.0116 |
|                       | <b>M_uni</b>        |                |                        |                |                        |                |                        |                |
| ATB sales of interest | 1.20<br>0.96-1.48   | 0.62<br>0.0361 | 1.13<br>0.91-1.41      | 0.50<br>0.0360 | 1.19<br>0.95-1.49      | 0.67<br>0.0313 | 1.03<br>0.89-1.19      | 0.76<br>0.0110 |
| Global ATB sales      | 1.14<br>0.90-1.42   | 0.68<br>0.0387 | 1.10<br>0.87-1.40      | 0.54<br>0.0367 | 1.14<br>0.90-1.45      | 0.74<br>0.0328 | 0.94<br>0.75-1.19      | 0.75<br>0.0116 |
| GHS index             | 1.13<br>0.86-1.49   | 0.65<br>0.0431 | 1.17<br>0.90-1.53      | 0.50<br>0.0400 | 1.15<br>0.86-1.55      | 0.70<br>0.0365 | 1.06<br>0.75-1.49      | 0.77<br>0.0117 |
| GDP                   | 1.14<br>0.93-1.39   | 0.67<br>0.0363 | 1.14<br>0.95-1.37      | 0.51<br>0.0358 | 1.12<br>0.91-1.38      | 0.71<br>0.0322 | 1.09<br>0.92-1.29      | 0.77<br>0.0101 |
| Extreme events        | 0.82<br>0.62-1.08   | 0.62<br>0.0427 | 0.79<br>0.61-1.02      | 0.47<br>0.0398 | 0.81<br>0.60-1.10      | 0.67<br>0.0361 | 0.92<br>0.68-1.24      | 0.76<br>0.0117 |
| Temperature           | 0.87<br>0.68-1.12   | 0.67<br>0.0430 | 0.86<br>0.68-1.08      | 0.52<br>0.0390 | 0.85<br>0.64-1.11      | 0.73<br>0.0359 | 1.25<br>0.96-1.63      | 0.71<br>0.0103 |
| Rainfall              | 0.94<br>0.76-1.17   | 0.67<br>0.0429 | 0.97<br>0.78-1.20      | 0.52<br>0.0399 | 0.95<br>0.76-1.20      | 0.72<br>0.0364 | 1.03<br>0.81-1.32      | 0.77<br>0.116  |
| Relative Humidity     | 1.13<br>0.89-1.42   | 0.71<br>0.0428 | 1.19<br>0.95-1.49      | 0.55<br>0.0390 | 1.16<br>0.91-1.48      | 0.78<br>0.0358 | 0.88<br>0.69-1.13      | 0.74<br>0.0113 |
| Population Density    | 0.81<br>0.62-1.06   | 0.64<br>0.0439 | 0.82<br>0.62-1.09      | 0.50<br>0.0407 | 0.81<br>0.61-1.09      | 0.68<br>0.0370 | 0.86<br>0.62-1.20      | 0.76<br>0.0121 |
| Tourist Arrivals      | 1.18<br>0.89-1.56   | 0.75<br>0.0422 | 1.02<br>0.79-1.33      | 0.54<br>0.0400 | 1.18<br>0.88-1.57      | 0.80<br>0.0361 | 1.05<br>0.74-1.48      | 0.80<br>0.0114 |
| Tourist Departures    | 1.09<br>0.88-1.36   | 0.69<br>0.0430 | 1.15<br>0.94-1.40      | 0.52<br>0.0403 | 1.08<br>0.86-1.37      | 0.74<br>0.0365 | 1.00<br>0.79-1.26      | 0.77<br>0.0116 |

\*spatial (top) and temporal (bottom) random effect

I.

|                       | Main analysis                   |                              | Sensitivity analysis 1          |                              | Sensitivity analysis 2          |                              | Sensitivity analysis 3          |                              |
|-----------------------|---------------------------------|------------------------------|---------------------------------|------------------------------|---------------------------------|------------------------------|---------------------------------|------------------------------|
| Data                  | (n=437; C=38; Y=14)             |                              | (n=310; C=30; Y=14)             |                              | (n=396; C=34; Y=14)             |                              | (n=340; C=31; Y=14)             |                              |
| Variable              | FE                              | RE *                         | FE                              | RE *                         | FE                              | RE *                         | FE                              | RE *                         |
|                       | <b>M_null</b>                   |                              |                                 |                              |                                 |                              |                                 |                              |
| $\hat{\beta}_0$       | 0.30<br>0.25-0.36               | 0.28<br>0.0053               | 0.31<br>0.25-0.38               | 0.32<br>0.0055               | 0.33<br>0.28-0.29               | 0.21<br>0.0053               | 0.23<br>0.18-0.29               | 0.39<br>0.0102               |
|                       | <b>M_uni</b>                    |                              |                                 |                              |                                 |                              |                                 |                              |
| ATB sales of interest | 1.03<br>0.92-1.16               | 0.27<br>0.0054               | 1.04<br>0.91-1.18               | 0.32<br>0.0056               | 1.02<br>0.91-1.14               | 0.21<br>0.0053               | 1.00<br>0.84-1.19               | 0.39<br>0.0102               |
| Global ATB sales      | <b>1.12</b><br><b>1.01-1.25</b> | <b>0.26</b><br><b>0.0053</b> | 1.12<br>0.99-1.26               | 0.31<br>0.0055               | 1.09<br>0.98-1.21               | 0.21<br>0.0052               | 1.11<br>0.94-1.31               | 0.40<br>0.0102               |
| GHS index             | 0.93<br>0.78-1.09               | 0.27<br>0.0053               | 0.91<br>0.75-1.11               | 0.31<br>0.0055               | 0.99<br>0.85-1.16               | 0.21<br>0.0053               | 0.84<br>0.67-1.05               | 0.35<br>0.0105               |
| GDP                   | 0.93<br>0.84-1.03               | 0.26<br>0.0047               | <b>0.87</b><br><b>0.78-0.96</b> | <b>0.28</b><br><b>0.0046</b> | 0.93<br>0.85-1.03               | 0.19<br>0.0046               | <b>0.72</b><br><b>0.62-0.82</b> | <b>0.26</b><br><b>0.0027</b> |
| Extreme events        | 1.15<br>0.97-1.37               | 0.26<br>0.0053               | 1.16<br>0.95-1.41               | 0.30<br>0.0055               | 1.12<br>0.95-1.32               | 0.20<br>0.0053               | 1.22<br>0.99-1.49               | 0.34<br>0.0104               |
| Temperature           | 1.11<br>0.97-1.26               | 0.26<br>0.0060               | 1.08<br>0.94-1.25               | 0.31<br>0.0061               | 1.06<br>0.93-1.20               | 0.20<br>0.0056               | <b>1.33</b><br><b>1.12-1.58</b> | <b>0.29</b><br><b>0.0120</b> |
| Rainfall              | 0.97<br>0.88-1.07               | 0.28<br>0.0054               | 0.95<br>0.86-1.05               | 0.33<br>0.0056               | 0.96<br>0.87-1.07               | 0.21<br>0.0053               | 1.02<br>0.85-1.22               | 0.38<br>0.0103               |
| Relative Humidity     | <b>0.89</b><br><b>0.81-0.98</b> | <b>0.23</b><br><b>0.0062</b> | <b>0.88</b><br><b>0.80-0.97</b> | <b>0.27</b><br><b>0.0066</b> | <b>0.91</b><br><b>0.83-0.99</b> | <b>0.18</b><br><b>0.0060</b> | <b>0.80</b><br><b>0.69-0.92</b> | <b>0.29</b><br><b>0.0110</b> |
| Population Density    | 0.90<br>0.76-1.06               | 0.26<br>0.0053               | 0.86<br>0.71-1.05               | 0.30<br>0.0054               | 0.98<br>0.84-1.15               | 0.21<br>0.0053               | 0.80<br>0.63-1.02               | 0.36<br>0.0098               |
| Tourist Arrivals      | 0.88<br>0.76-1.02               | 0.28<br>0.0048               | <b>0.84</b><br><b>0.71-0.98</b> | <b>0.31</b><br><b>0.0046</b> | 0.90<br>0.78-1.03               | 0.21<br>0.0048               | 0.84<br>0.69-1.01               | 0.36<br>0.0085               |
| Tourist Departures    | 0.92<br>0.82-1.02               | 0.25<br>0.0049               | 0.91<br>0.81-1.03               | 0.29<br>0.0050               | 0.93<br>0.83-1.04               | 0.19<br>0.0049               | 0.85<br>0.71-1.03               | 0.30<br>0.0095               |

PR-Sp

\*spatial (top) and temporal (bottom) random effect

**Supplementary Table S5. Univariate results for the main analysis and sensitivity analyses 1 (analysis with a 20 isolates threshold for country-year observations), 2 (analysis without countries where IQVIA data is not available) and 3 (analysis with isolates from blood source only), for all drug-bug pairs.**

Estimated coefficients from univariate analyses, using the mixed-effect negative binomial, for FR-Ec (A); APR-Ec (B); 3GCR-Ec (C); 3GCR-Kp (D); CR-Kp (E); CR-Pa (F); CR-Ab (G); VR-E (H); PR-Sp (I). Data represent n, the number of observations; C, the number of countries and Y, the number of years. Models represent M\_null, the intercept-only model and M\_uni, the univariate model. Fixed effects (FE) are reported in the exponential form. Random effects (RE) are reported: spatial (top) and temporal (bottom). Coefficients associated with a p-value < 5% are highlighted in bold. Antibiotic sales of interest for each drug-bug pair were the following: quinolones (FR-Ec); broad-spectrum penicillins (APR-Ec and PR-Sp); third generation cephalosporins (3GCR-Ec and 3GCR-Kp); carbapenems (CR-Kp; CR-Pa and CR-Ab) and glycopeptides (VR-E).

A.

|                                             | Main analysis       | Sensitivity analysis 1 | Sensitivity analysis 2 | Sensitivity analysis 3 |
|---------------------------------------------|---------------------|------------------------|------------------------|------------------------|
| Data                                        | (n=471; C=41; Y=14) | (n=471; C=41; Y=14)    | (n=429; C=37; Y=14)    | (n=415; C=38; Y=14)    |
| Fixed Effects $e^{\beta}$ [95% CI]          |                     |                        |                        |                        |
| $\hat{\beta}_0$                             | 0.33<br>0.30-0.36   | 0.33<br>0.30-0.36      | 0.35<br>0.33-0.38      | 0.33<br>0.29-0.36      |
| ATB sales of interest                       | 1.11<br>1.06-1.17   | 1.11<br>1.06-1.17      | 1.10<br>1.04-1.16      | 1.07<br>1.00-1.15      |
| Global ATB sales                            | -                   | -                      | -                      | -                      |
| GHS index                                   | 0.88<br>0.80-0.96   | 0.87<br>0.80-0.96      | -                      | 0.82<br>0.74-0.91      |
| GDP                                         | -                   | -                      | 0.92<br>0.87-0.97      | -                      |
| Extreme events                              | 1.16<br>1.05-1.27   | 1.16<br>1.05-1.27      | 1.11<br>1.02-1.22      | 1.13<br>1.01-1.27      |
| Temperature                                 | 1.13<br>1.05-1.23   | 1.13<br>1.04-11.23     | -                      | -                      |
| Rainfall                                    | -                   | -                      | 1.11<br>1.05-1.18      | -                      |
| Relative Humidity                           | -                   | -                      | 0.90<br>0.94-0.97      | -                      |
| Population Density                          | -                   | -                      | 1.11<br>1.03-1.20      | -                      |
| Tourist Arrivals                            | -                   | -                      | -                      | -                      |
| Tourist Departures                          | -                   | -                      | -                      | 0.91<br>0.83-1.00      |
| Variance of Random Effects $\hat{\sigma}^2$ |                     |                        |                        |                        |
| $\hat{\sigma}_{b_c}^2$                      | 0.07                | 0.07                   | 0.05                   | 0.09                   |
| $\hat{\sigma}_{\phi_t}^2$                   | 0.0003              | 0.0003                 | 0.0004                 | 0.0000                 |

FR-EC

B.

|                                             | Main analysis       | Sensitivity analysis 1 | Sensitivity analysis 2 | Sensitivity analysis 3 |
|---------------------------------------------|---------------------|------------------------|------------------------|------------------------|
| Data                                        | (n=471; C=41; Y=14) | (n=471; C=41; Y=14)    | (n=429; C=37; Y=14)    | (n=415; C=38; Y=14)    |
| Fixed Effects $e^{\beta}$ [95% CI]          |                     |                        |                        |                        |
| $\hat{\beta}_0$                             | 0.65<br>0.63-0.68   | 0.65<br>0.63-0.67      | 0.66<br>0.64-0.69      | 0.66<br>0.64-0.69      |
| ATB sales of interest                       | -                   | -                      | -                      | -                      |
| Global ATB sales                            | -                   | -                      | -                      | -                      |
| GHS index                                   | 0.95<br>0.92-0.99   | 0.95<br>0.91-0.99      | 0.95<br>0.92-0.99      | 0.91<br>0.88-0.95      |
| GDP                                         | -                   | -                      | -                      | -                      |
| Extreme events                              | 1.05<br>1.01-1.09   | 1.05<br>1.01-1.09      | 1.06<br>1.02-1.10      | 1.05<br>1.01-1.09      |
| Temperature                                 | 1.04<br>1.00-1.08   | 1.04<br>1.00-1.08      | 1.06<br>1.02-1.10      | -                      |
| Rainfall                                    | -                   | -                      | -                      | -                      |
| Relative Humidity                           | -                   | -                      | -                      | -                      |
| Population Density                          | -                   | -                      | -                      | -                      |
| Tourist Arrivals                            | -                   | -                      | -                      | 0.96<br>0.92-0.99      |
| Tourist Departures                          | 0.96<br>0.93-1.00   | 0.96<br>0.93-1.00      | -                      | -                      |
| Variance of Random Effects $\hat{\sigma}^2$ |                     |                        |                        |                        |
| $\hat{\sigma}_{b_c}^2$                      | 0.01                | 0.01                   | 0.01                   | 0.01                   |
| $\hat{\sigma}_{\phi_t}^2$                   | 0.0003              | 0.0004                 | 0.0005                 | 0.0000                 |

APR-EC

C.

3GCR-EC

|                                             | Main analysis       | Sensitivity analysis 1 | Sensitivity analysis 2 | Sensitivity analysis 3 |
|---------------------------------------------|---------------------|------------------------|------------------------|------------------------|
| Data                                        | (n=471; C=41; Y=14) | (n=471; C=41; Y=14)    | (n=429; C=37; Y=14)    | (n=415; C=38; Y=14)    |
| Fixed Effects $e^{\hat{\beta}}$ [95% CI]    |                     |                        |                        |                        |
| $\hat{\beta}_0$                             | 0.21<br>0.18-0.23   | 0.21<br>0.18-0.23      | 0.22<br>0.20-0.25      | 0.18<br>0.15-0.22      |
| ATB sales of interest                       | -                   | -                      | -                      | -                      |
| Global ATB sales                            | -                   | -                      | -                      | -                      |
| GHS index                                   | 0.81<br>0.72-0.91   | 0.81<br>0.72-0.91      | 0.84<br>0.74-0.94      | 0.75<br>0.63-0.88      |
| GDP                                         | -                   | -                      | -                      | -                      |
| Extreme events                              | 1.20<br>1.06-1.36   | 1.20<br>1.06-1.36      | 1.20<br>1.06-1.35      | 1.21<br>1.01-1.43      |
| Temperature                                 | 1.15<br>1.03-1.29   | 1.16<br>1.03-1.29      | 1.15<br>1.03-1.28      | -                      |
| Rainfall                                    | -                   | -                      | -                      | -                      |
| Relative Humidity                           | -                   | -                      | -                      | -                      |
| Population Density                          | -                   | -                      | -                      | -                      |
| Tourist Arrivals                            | -                   | -                      | -                      | -                      |
| Tourist Departures                          | -                   | -                      | -                      | 0.84<br>0.73-0.97      |
| Variance of Random Effects $\hat{\sigma}^2$ |                     |                        |                        |                        |
| $\hat{\sigma}_{b_c}^2$                      | 0.13                | 0.13                   | 0.11                   | 0.22                   |
| $\hat{\sigma}_{\phi_t}^2$                   | 0.0123              | 0.0130                 | 0.0111                 | 0.0096                 |

D.

3GCR-Kp

|                                             | Main analysis       | Sensitivity analysis 1 | Sensitivity analysis 2 | Sensitivity analysis 3 |
|---------------------------------------------|---------------------|------------------------|------------------------|------------------------|
| Data                                        | (n=467; C=41; Y=14) | (n=443; C=39; Y=14)    | (n=425; C=37; Y=14)    | (n=406; C=37; Y=14)    |
| Fixed Effects $e^{\hat{\beta}}$ [95% CI]    |                     |                        |                        |                        |
| $\hat{\beta}_0$                             | 0.31<br>0.26-0.36   | 0.32<br>0.27-0.37      | 0.32<br>0.27-0.37      | 0.31<br>0.26-0.36      |
| ATB sales of interest                       | -                   | -                      | -                      | -                      |
| Global ATB sales                            | -                   | -                      | -                      | -                      |
| GHS index                                   | 0.61<br>0.52-0.71   | 0.62<br>0.54-0.72      | 0.66<br>0.57-0.78      | 0.62<br>0.53-0.73      |
| GDP                                         | -                   | -                      | -                      | -                      |
| Extreme events                              | -                   | -                      | -                      | -                      |
| Temperature                                 | -                   | -                      | 1.14<br>1.00-1.31      | 1.16<br>1.01-1.32      |
| Rainfall                                    | -                   | -                      | -                      | -                      |
| Relative Humidity                           | -                   | -                      | -                      | -                      |
| Population Density                          | -                   | -                      | -                      | -                      |
| Tourist Arrivals                            | -                   | -                      | -                      | -                      |
| Tourist Departures                          | -                   | -                      | -                      | -                      |
| Variance of Random Effects $\hat{\sigma}^2$ |                     |                        |                        |                        |
| $\hat{\sigma}_{b_c}^2$                      | 0.24                | 0.22                   | 0.21                   | 0.19                   |
| $\hat{\sigma}_{\phi_t}^2$                   | 0.0042              | 0.0041                 | 0.0039                 | 0.0035                 |

E.

CR-Kp

|                                             | Main analysis       | Sensitivity analysis 1 | Sensitivity analysis 2 | Sensitivity analysis 3 |
|---------------------------------------------|---------------------|------------------------|------------------------|------------------------|
| Data                                        | (n=413; C=35; Y=14) | (n=390; C=33; Y=14)    | (n=406; C=34; Y=14)    | (n=295; C=27; Y=14)    |
| Fixed Effects $e^{\beta}$ [95% CI]          |                     |                        |                        |                        |
| $\hat{\beta}_0$                             | 0.02<br>0.01-0.04   | 0.02<br>0.01-0.04      | 0.02<br>0.01-0.04      | 0.04<br>0.02-0.07      |
| ATB sales of interest                       | -                   | -                      | -                      | -                      |
| Global ATB sales                            | -                   | -                      | -                      | -                      |
| GHS index                                   | 0.64<br>0.44-0.94   | 0.64<br>0.43-0.95      | 0.63<br>0.43-0.93      | 0.56<br>0.38-0.82      |
| GDP                                         | -                   | -                      | -                      | -                      |
| Extreme events                              | -                   | -                      | -                      | -                      |
| Temperature                                 | 1.76<br>1.25-2.48   | 1.66<br>1.17-2.37      | 1.71<br>1.21-2.43      | -                      |
| Rainfall                                    | -                   | -                      | -                      | -                      |
| Relative Humidity                           | -                   | -                      | -                      | -                      |
| Population Density                          | -                   | -                      | -                      | -                      |
| Tourist Arrivals                            | -                   | -                      | -                      | -                      |
| Tourist Departures                          | -                   | -                      | -                      | -                      |
| Variance of Random Effects $\hat{\sigma}^2$ |                     |                        |                        |                        |
| $\hat{\sigma}_{b_c}^2$                      | 1.13                | 1.17                   | 1.15                   | 0.87                   |
| $\hat{\sigma}_{\phi_t}^2$                   | 0.4855              | 0.5290                 | 0.4827                 | 0.4332                 |

F.

CR-Pa

|                                             | Main analysis       | Sensitivity analysis 1 | Sensitivity analysis 2 | Sensitivity analysis 3 |
|---------------------------------------------|---------------------|------------------------|------------------------|------------------------|
| Data                                        | (n=472; C=41; Y=14) | (n=444; C=39; Y=14)    | (n=430; C=37; Y=14)    | (n=356; C=32; Y=14)    |
| Fixed Effects $e^{\beta}$ [95% CI]          |                     |                        |                        |                        |
| $\hat{\beta}_0$                             | 0.19<br>0.17-0.22   | 0.20<br>0.17-0.22      | 0.21<br>0.18-0.23      | 0.18<br>0.16-0.22      |
| ATB sales of interest                       | -                   | -                      | -                      | -                      |
| Global ATB sales                            | -                   | -                      | -                      | -                      |
| GHS index                                   | 0.73<br>0.66-0.82   | 0.72<br>0.65-0.80      | 0.76<br>0.68-0.85      | 0.54<br>0.44-0.67      |
| GDP                                         | -                   | -                      | -                      | 1.47<br>1.22-1.78      |
| Extreme events                              | -                   | -                      | -                      | -                      |
| Temperature                                 | -                   | -                      | -                      | -                      |
| Rainfall                                    | -                   | -                      | -                      | -                      |
| Relative Humidity                           | -                   | -                      | -                      | 0.76<br>0.65-0.89      |
| Population Density                          | -                   | -                      | -                      | -                      |
| Tourist Arrivals                            | -                   | -                      | 1.12<br>1.01-1.23      | -                      |
| Tourist Departures                          | 0.89<br>0.81-0.98   | 0.89<br>0.81-0.97      | 0.87<br>0.79-0.96      | -                      |
| Variance of Random Effects $\hat{\sigma}^2$ |                     |                        |                        |                        |
| $\hat{\sigma}_{b_c}^2$                      | 0.11                | 0.09                   | 0.09                   | 0.18                   |
| $\hat{\sigma}_{\phi_t}^2$                   | 0.0233              | 0.0244                 | 0.0200                 | 0.0000                 |



G.

CR-Ab

|                                             | Main analysis       | Sensitivity analysis 1 | Sensitivity analysis 2 | Sensitivity analysis 3 |
|---------------------------------------------|---------------------|------------------------|------------------------|------------------------|
| Data                                        | (n=410; C=37; Y=14) | (n=272; C=28; Y=14)    | (n=396; C=35; Y=14)    | (n=292; C=29; Y=14)    |
| Fixed Effects $e^{\hat{\beta}}$ [95% CI]    |                     |                        |                        |                        |
| $\hat{\beta}_0$                             | 0.39<br>0.29-0.53   | 0.46<br>0.35-0.60      | 0.39<br>0.29-0.52      | 0.36<br>0.28-0.46      |
| ATB sales of interest                       | 1.16<br>1.06-1.26   | 1.19<br>1.09-1.30      | 1.15<br>1.06-1.25      | 1.21<br>1.04-1.39      |
| Global ATB sales                            | 0.82<br>0.72-0.93   | 0.83<br>0.71-0.96      | 0.84<br>0.74-0.95      | -                      |
| GHS index                                   | 0.58<br>0.42-0.79   | 0.62<br>0.47-0.80      | 0.60<br>0.44-0.81      | 0.55<br>0.43-0.70      |
| GDP                                         | 1.23<br>1.04-1.47   | 1.30<br>1.08-1.56      | 1.21<br>1.01-1.45      | -                      |
| Extreme events                              | -                   | -                      | -                      | -                      |
| Temperature                                 | -                   | -                      | -                      | -                      |
| Rainfall                                    | -                   | -                      | -                      | -                      |
| Relative Humidity                           | -                   | -                      | -                      | -                      |
| Population Density                          | -                   | -                      | -                      | -                      |
| Tourist Arrivals                            | -                   | -                      | -                      | -                      |
| Tourist Departures                          | -                   | 0.82<br>0.71-0.93      | 0.87<br>0.76-0.99      | 0.82<br>0.69-0.97      |
| Variance of Random Effects $\hat{\sigma}^2$ |                     |                        |                        |                        |
| $\hat{\sigma}_{b_c}^2$                      | 0.80                | 0.47                   | 0.70                   | 0.33                   |
| $\hat{\sigma}_{\phi_t}^2$                   | 0.0226              | 0.0161                 | 0.0213                 | 0.0203                 |

H.

VR-E

|                                             | Main analysis       | Sensitivity analysis 1 | Sensitivity analysis 2 | Sensitivity analysis 3 |
|---------------------------------------------|---------------------|------------------------|------------------------|------------------------|
| Data                                        | (n=423; C=37; Y=14) | (n=325; C=28; Y=14)    | (n=394; C=34; Y=14)    | (n=333; C=30; Y=14)    |
| Fixed Effects $e^{\hat{\beta}}$ [95% CI]    |                     |                        |                        |                        |
| $\hat{\beta}_0$                             | 0.08<br>0.06-0.11   | 0.10<br>0.07-0.13      | 0.08<br>0.06-0.11      | 0.09<br>0.06-0.13      |
| ATB sales of interest                       | -                   | -                      | -                      | -                      |
| Global ATB sales                            | -                   | -                      | -                      | -                      |
| GHS index                                   | -                   | -                      | -                      | -                      |
| GDP                                         | -                   | -                      | -                      | -                      |
| Extreme events                              | -                   | -                      | -                      | -                      |
| Temperature                                 | -                   | -                      | -                      | -                      |
| Rainfall                                    | -                   | -                      | -                      | -                      |
| Relative Humidity                           | -                   | -                      | -                      | -                      |
| Population Density                          | -                   | -                      | -                      | -                      |
| Tourist Arrivals                            | -                   | -                      | -                      | -                      |
| Tourist Departures                          | -                   | -                      | -                      | -                      |
| Variance of Random Effects $\hat{\sigma}^2$ |                     |                        |                        |                        |
| $\hat{\sigma}_{b_c}^2$                      | 0.67                | 0.53                   | 0.73                   | 0.77                   |
| $\hat{\sigma}_{\phi_t}^2$                   | 0.0430              | 0.04                   | 0.0364                 | 0.0116                 |

I.

PR-Sp

|                                             | Main analysis       | Sensitivity analysis 1 | Sensitivity analysis 2 | Sensitivity analysis 3 |
|---------------------------------------------|---------------------|------------------------|------------------------|------------------------|
| Data                                        | (n=437; C=38; Y=14) | (n=310; C=30; Y=14)    | (n=396; C=34; Y=14)    | (n=340; C=31; Y=14)    |
| Fixed Effects $e^{\hat{\beta}}$ [95% CI]    |                     |                        |                        |                        |
| $\hat{\beta}_0$                             | 0.30<br>0.26-0.36   | 0.31<br>0.26-0.37      | 0.33<br>0.28-0.39      | 0.22<br>0.18-0.27      |
| ATB sales of interest                       | -                   | -                      | -                      | -                      |
| Global ATB sales                            | 1.12<br>1.01-1.24   | 1.16<br>1.05-1.29      | -                      | -                      |
| GHS index                                   | -                   | -                      | -                      | -                      |
| GDP                                         | -                   | 0.86<br>0.78-0.95      | -                      | 0.74<br>0.64-0.85      |
| Extreme events                              | -                   | -                      | -                      | -                      |
| Temperature                                 | -                   | -                      | -                      | -                      |
| Rainfall                                    | -                   | -                      | -                      | -                      |
| Relative Humidity                           | 0.89<br>0.81-0.98   | 0.89<br>0.82-0.96      | 0.91<br>0.83-1.00      | 0.85<br>0.74-0.98      |
| Population Density                          | -                   | -                      | -                      | -                      |
| Tourist Arrivals                            | -                   | 0.86<br>0.75-0.99      | -                      | -                      |
| Tourist Departures                          | -                   | -                      | -                      | -                      |
| Variance of Random Effects $\hat{\sigma}^2$ |                     |                        |                        |                        |
| $\hat{\sigma}_{b_c}^2$                      | 0.22                | 0.22                   | 0.18                   | 0.23                   |
| $\hat{\sigma}_{\phi_t}^2$                   | 0.0062              | 0.0050                 | 0.0060                 | 0.0028                 |

**Supplementary Table S6. Multivariable results for the main analysis and sensitivity analyses 1 (analysis with a 20 isolates threshold for country-year observations), 2 (analysis without countries where IQVIA data is not available) and 3 (analysis with isolates from blood source only), for all drug-bug pairs.**

Estimated coefficients from multivariable analyses, using the mixed-effect negative binomial model, for FR-Ec (A); APR-Ec (B); 3GCR-Ec (C); 3GCR-Kp (D); CR-Kp (E); CR-Pa (F); CR-Ab (G); VR-E (H); PR-Sp (I). Data represent n, the number of observations; C, the number of countries and Y, the number of years. Fixed effects (FE) are reported in the exponential form. Random effects (RE) are reported as variances: spatial (top) and temporal (bottom). Antibiotic sales of interest for each drug-bug pair were the following: quinolones (FR-Ec); broad-spectrum penicillins (APR-Ec and PR-Sp); third generation cephalosporins (3GCR-Ec and 3GCR-Kp); carbapenems (CR-Kp; CR-Pa and CR-Ab) and glycopeptides (VR-E). Covariables that entered the model were selected from covariables associated with a p-value <20% in the univariate model, and backward selection was then performed. Covariables with – were not retained in the final M\_multi model.

### **Supplementary Result 1. Sensitivity analyses description.**

**Sensitivity analysis 1.** To assess the potential impact of defining a threshold on the minimum number of isolates tested by country-year on the quality of the model's estimations, we ran an additional analysis by using a threshold of 20 isolates instead of 10.

**Sensitivity analysis 2.** To assess the potential impact of using ESAC-Net data instead of IQVIA MIDAS data for antibiotic sales for Denmark, Latvia, Lithuania, and the Netherlands, we ran an additional analysis excluding these four countries.

**Sensitivity analysis 3.** To assess whether different isolates sources could impact the association between antibiotic resistance and covariables, we ran an additional analysis on a subset of isolates originating only from blood source (representing bloodstream infections (BSI)).

Sensitivity analysis 1 showed similar estimates for all covariables coefficients compared to the main analysis, in both the univariate and multivariable analysis. Choosing an isolate threshold of 10 to ensure data reliability was adequate, as sample size is high, but estimations are still consistent when increasing this threshold to 20.

For sensitivity analysis 2, covariables selected in the final multivariable model for FR-*Ec* were different than the main analysis. However, quinolones sales were still a relevant factor as it was kept in the final multivariable model. Results concerning association of antibiotic sales and antibiotic resistance were thus not affected by using EARS-Net data.

Overall, sensitivity analyses 1 and 2 showed that there were no major changes in interpretation in the statistical analyses.

Results from sensitivity analysis 3 were expected to be sensibly different: BSI are a particular infections' subset, usually associated with healthcare settings and worse medical outcomes. We decided to run that analysis even if including only BSI strongly reduces sample size and modifies drug-bug distributions, as BSI can represent more stable surveillance data across different countries. Indeed, some countries only reported few blood isolates per year, falling below the threshold of 10 isolates by country-year and were thus being removed from the analysis. Results should be considered accordingly. Number of blood isolates included in the analysis are depicted in sup figure S2 B (p19). In the results, temperature was not associated anymore with antibiotic resistance in FR-*Ec*, APR-*Ec*, 3GCR-*Ec* and CR-*Kp*, but was associated with 3GCR-*Kp*. Interestingly, temperature was still associated only with resistances in Enterobacterales. These results support the findings from the main analysis. GDP was not associated anymore with CR-*Ab* in the multivariable analysis. From the univariate analysis, we observed that CR-*Ab* estimates for GDP showed a different association (1.25 [1.02-1.54] in the main analysis versus 0.82 [0.60-1.12] in the BSI sensitivity analysis 3). This result suggest that high GDP is not significantly associated with high resistance in CR-*Ab* when looking at BSI infections only. Global antibiotic sales were not kept in the final multivariable model for PR-*Sp* but estimates from the univariate analysis were similar between the main analysis and BSI only. Overall, analysis of BSI showed stable results compared to main analysis, except for temperature associated with a different Enterobacterales pair, 3GCR-*Kp*, and GDP not associated with resistance in CR-*Ab*.

### A. FR-Ec

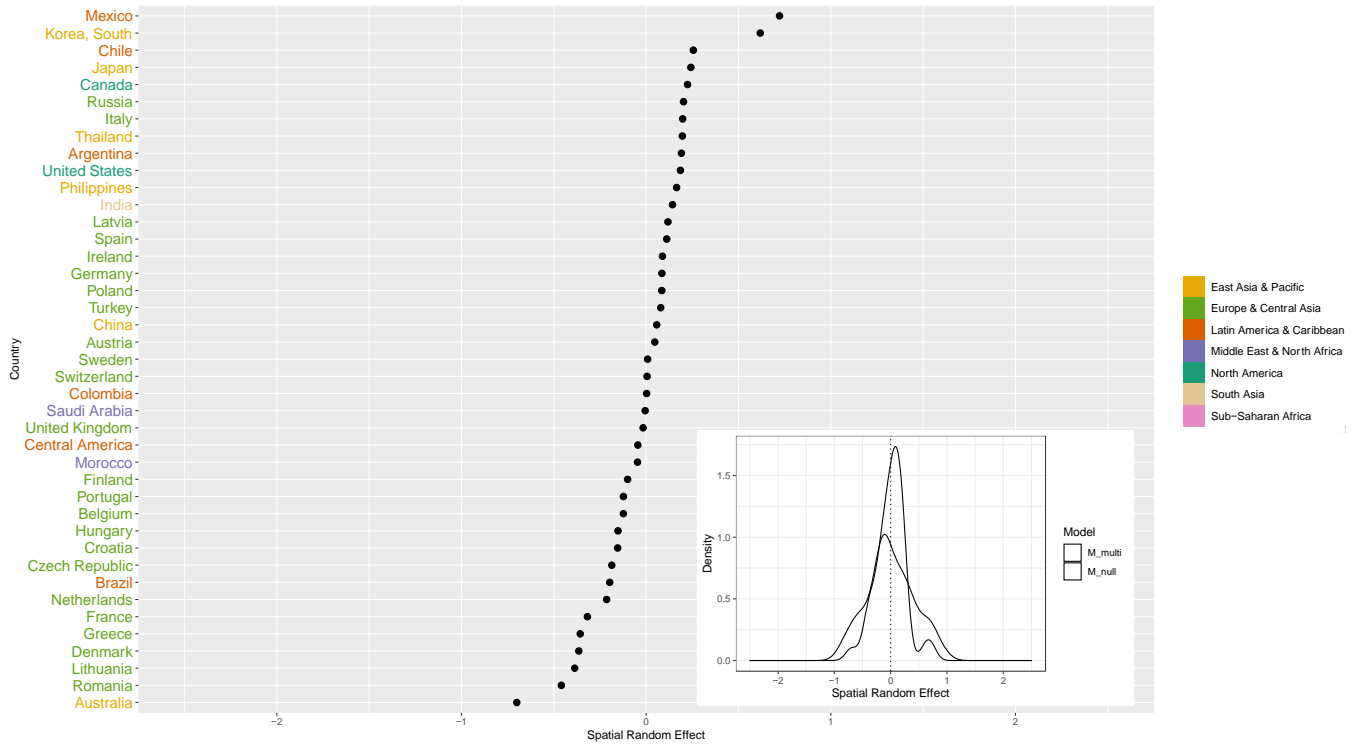

### B. APR-Ec

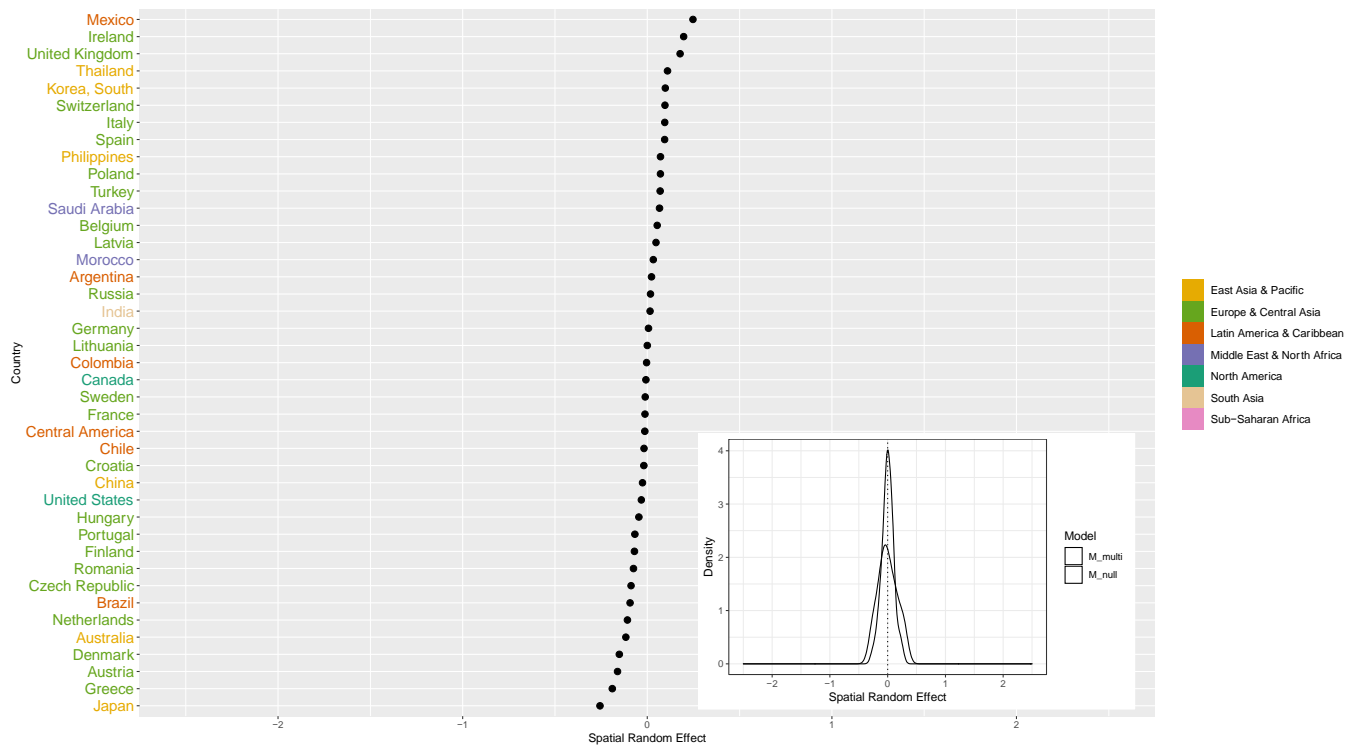

### C. 3GCR- $E_c$

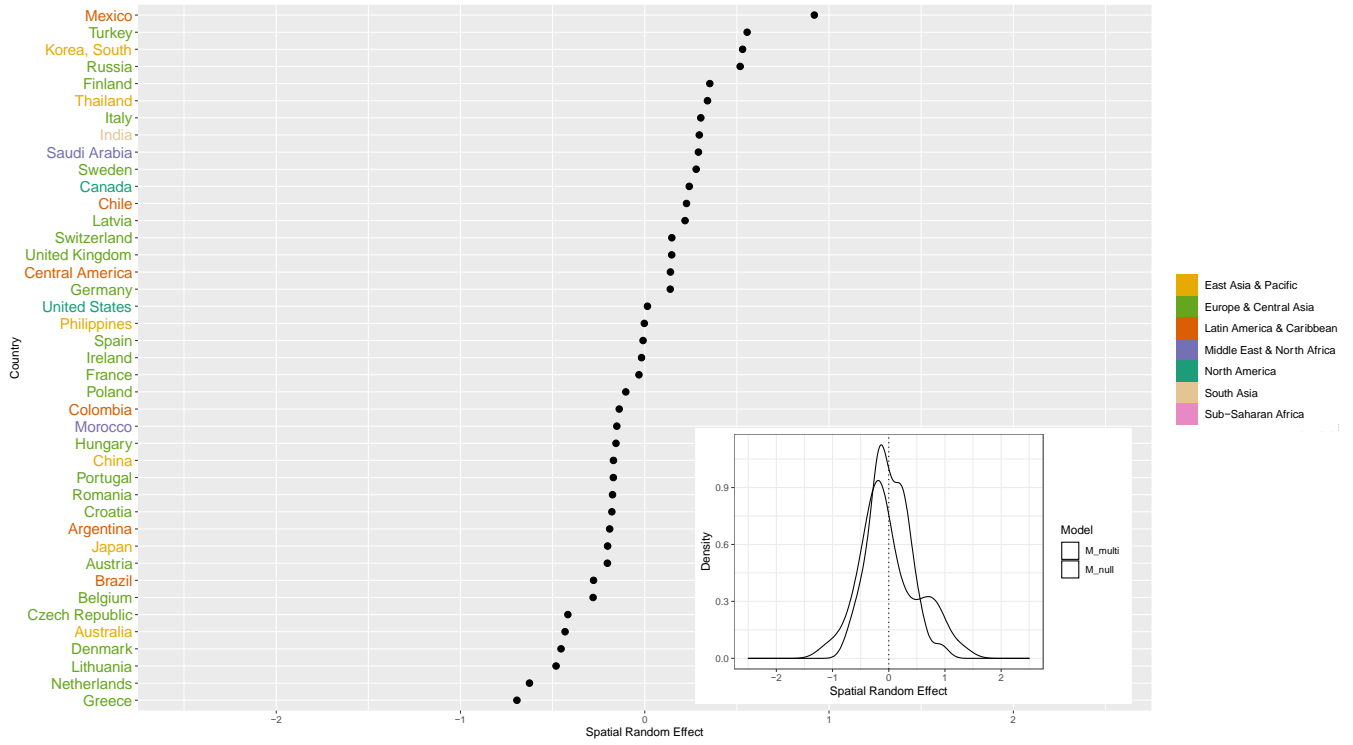

### D. 3GCR- $K_p$

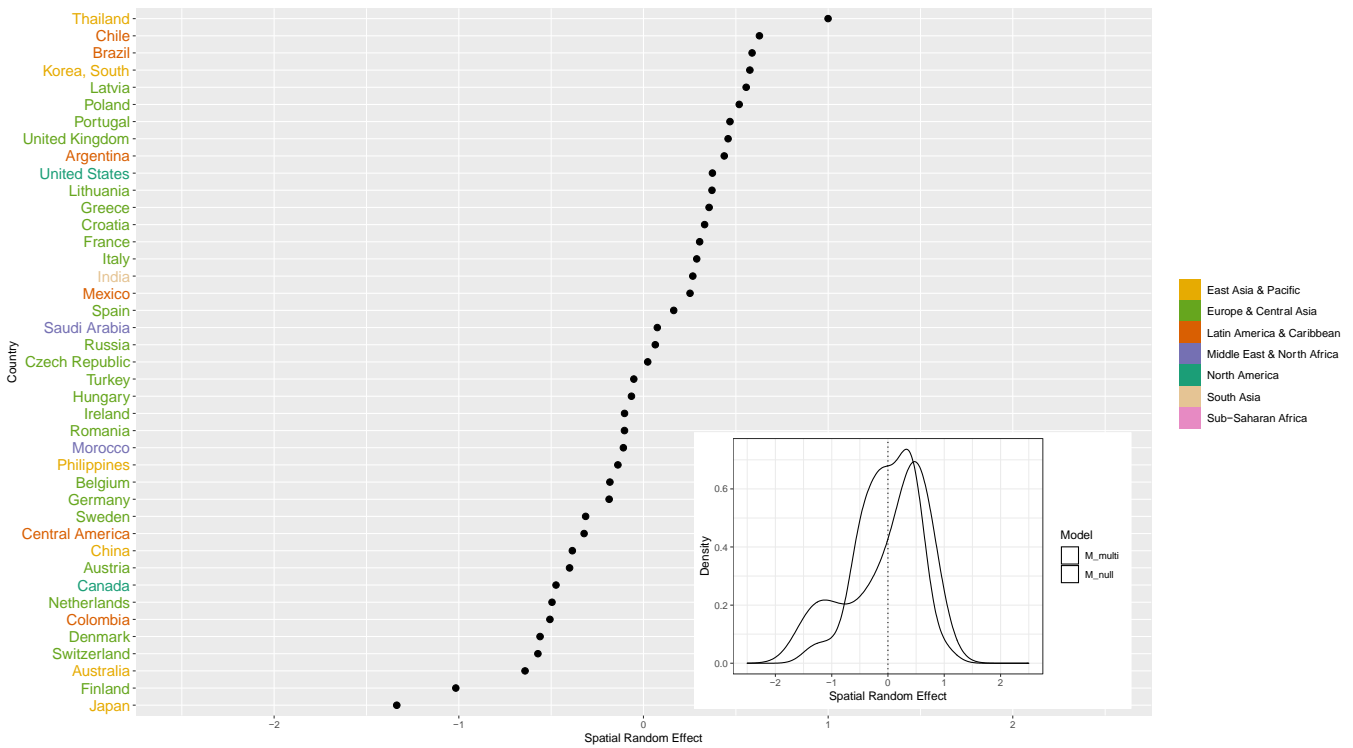

### E. CR-Kp

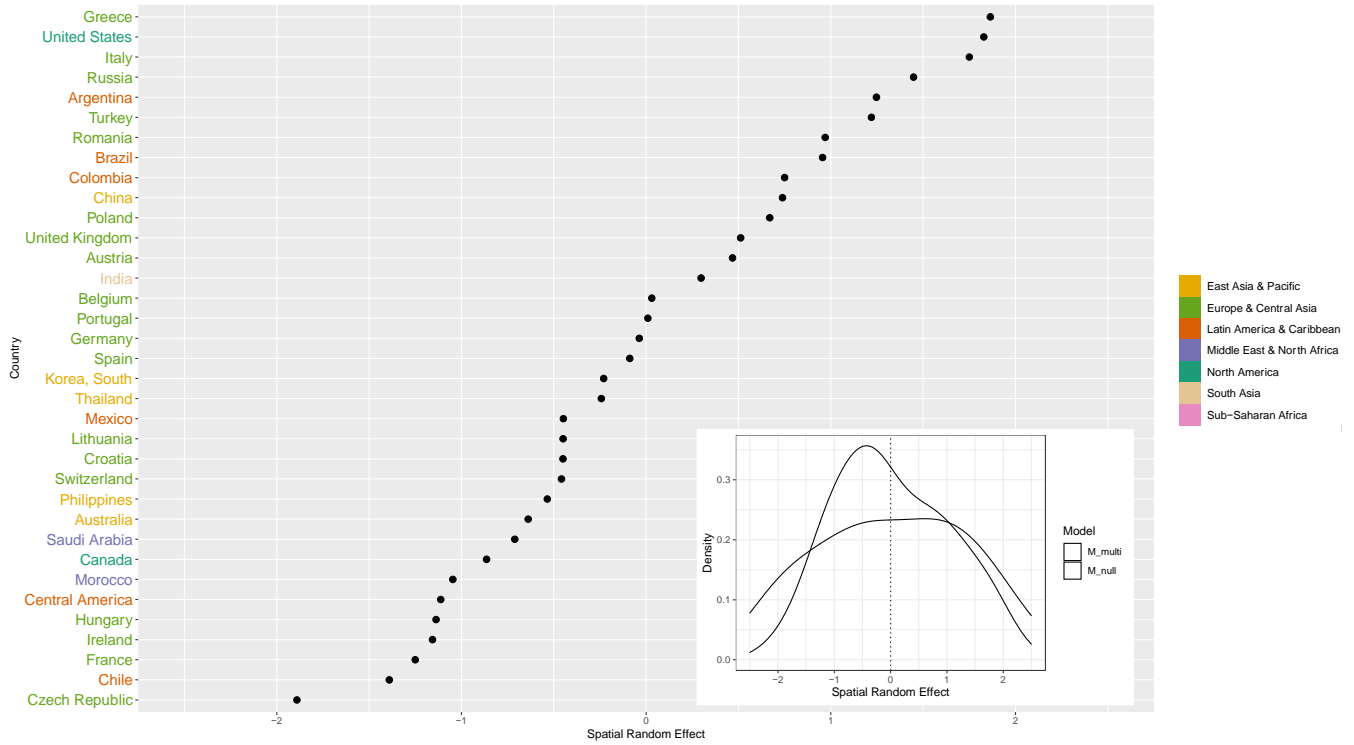

### F. CR-Pa

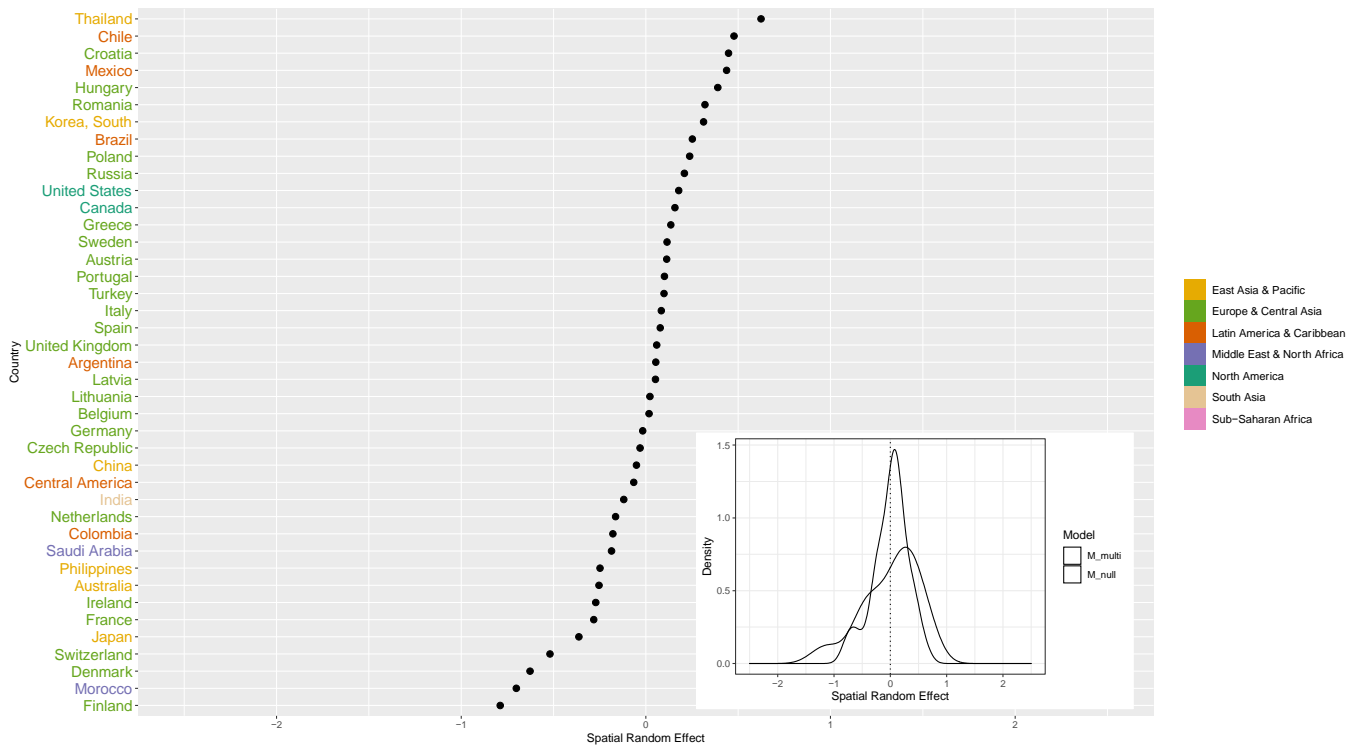

### G. CR-Ab

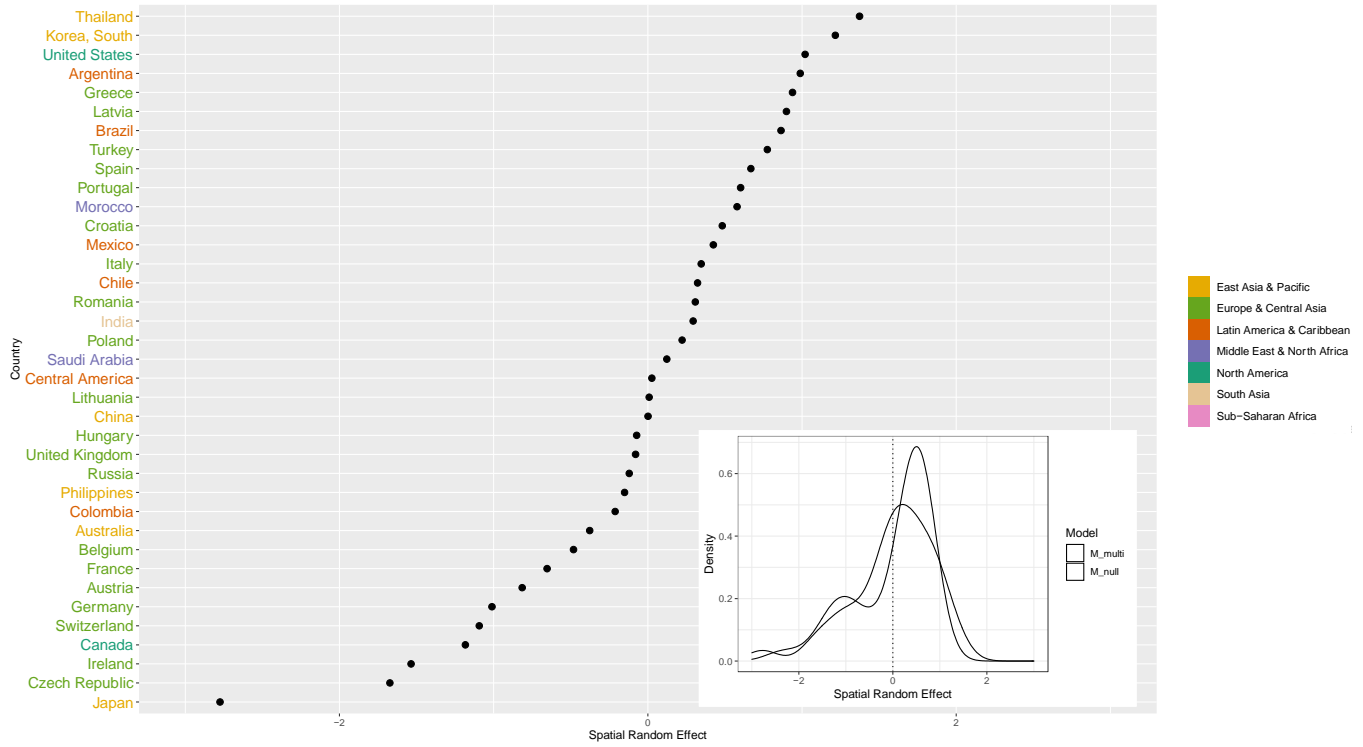

### H. VR-E

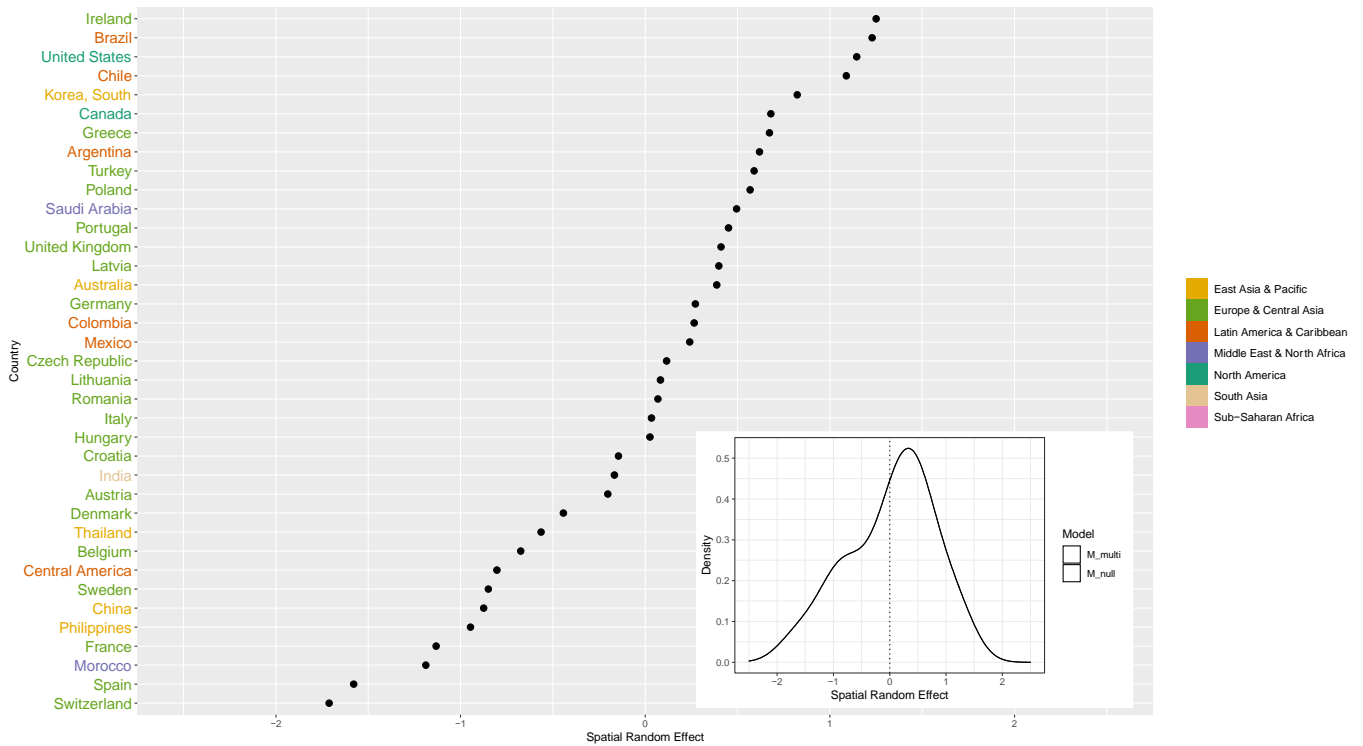

## I. PR-Sp

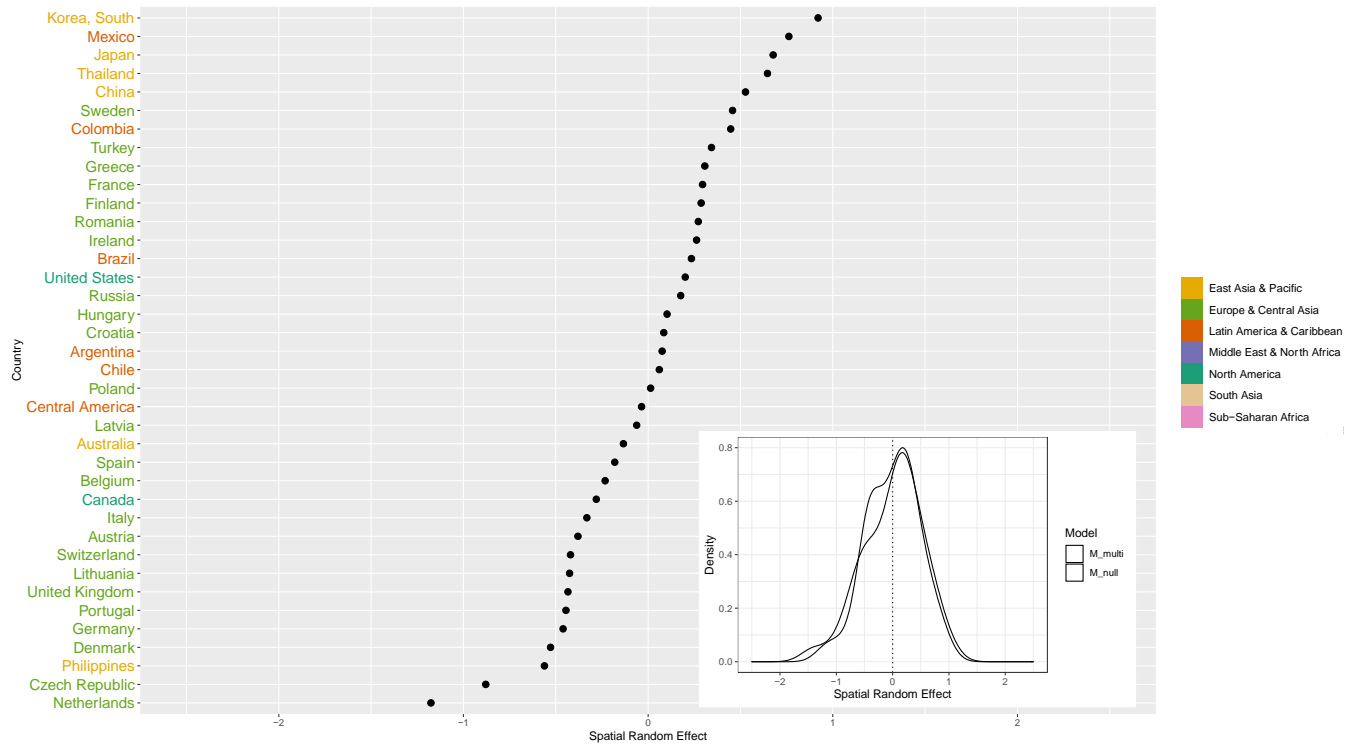

### **Supplementary Figure S7. Spatial Random Effects distribution, for all drug-bug pairs.**

Spatial Random Effects distribution for FR-*Ec* (A); APR-*Ec* (B); 3GCR-*Ec* (C); 3GCR-*Kp* (D); CR-*Kp* (E); CR-*Pa* (F); CR-*Ab* (G); VR-*E* (H); PR-*Sp* (I). Main plot shows the spatial Random Effects distribution per country from the final model M\_multi. Countries are colored based on world's regions (from World Bank indicators). Small right bottom plot represents the density of the spatial Random Effects for both M\_null (blue) and M\_multi (red).
